# Supplementary material for: Comparative transcriptome analysis during seeds development between two soybean cultivars
Source: PeerJ journal article supplement (doi:10.7717/peerj.10772), 2021-03-01
Supplement: Transcriptome_Analysis_Report.pdf [file Transcriptome_Analysis_Report.pdf]

# 转录组（有参）生物信息分析结题报告

Customer:赵嫚

Contract No:80-89030164

BI:陶春梅

Email:NGS.Service@geneviz.com

Date:2017-12-20

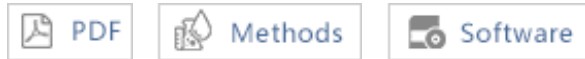

## 一、实验流程

转录组测序实验流程包括RNA提取、RNA样品质量检测、文库构建、文库纯化、文库检测、文库定量、测序簇的生成以及上机测序。每一个环节都会对数据质量和数量产生影响，而数据质量又会直接影响后续信息分析的结果，为了保证源头数据的准确性与可靠性，我们对每一步实验过程都进行严格质控，检测合格后，把不同文库按照有效浓度及目标下机数据量的需求混样后进行Illumina HiSeq测序。流程图如下：

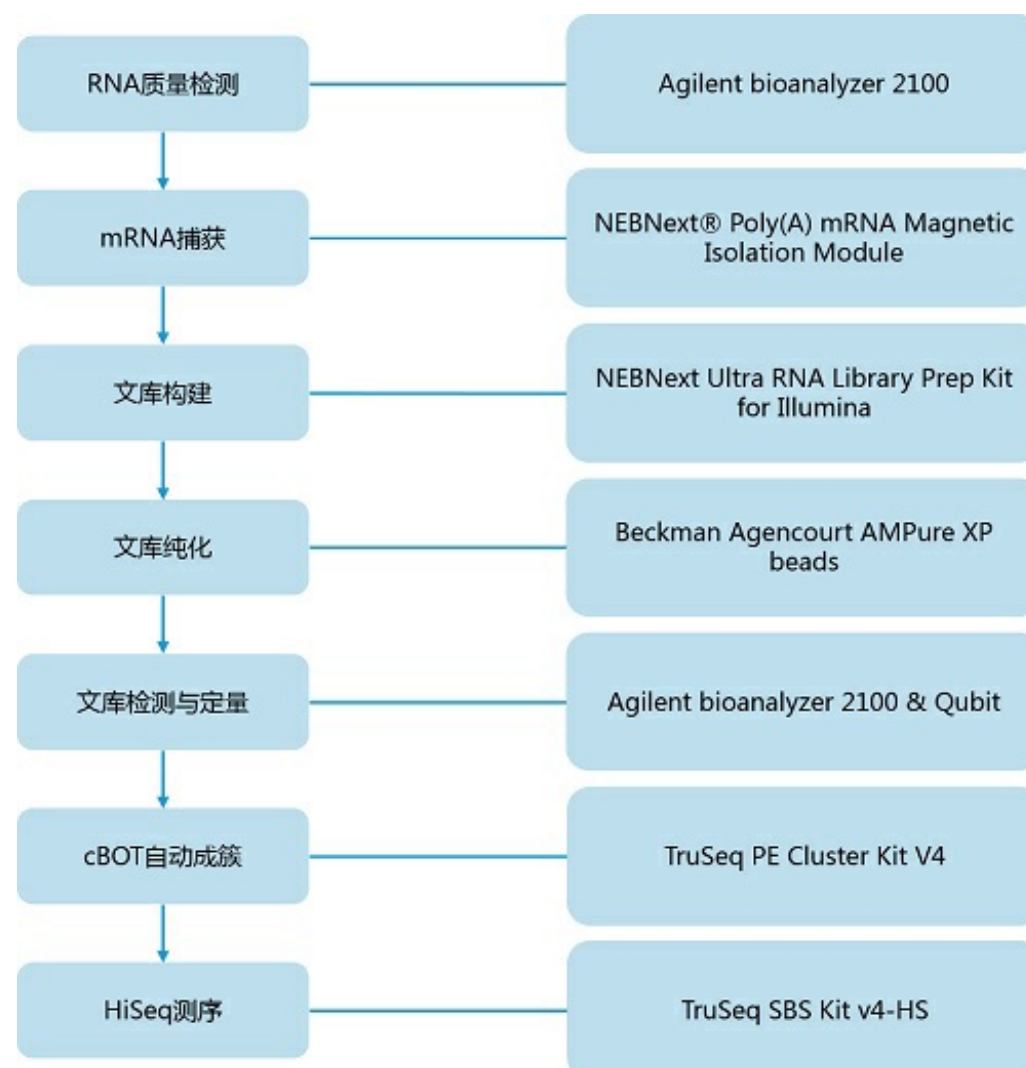

Figure 一.1 转录组实验流程

## 二、生物信息分析流程

转录组是特定细胞在某一功能状态下所能转录出来的所有RNA的总和，包括编码的mRNA和非编码RNA。转录组测序（Transcriptome sequencing）是基于Illumina HiSeq测序平台，研究特定组织或细胞在某个时期转录出来的所有mRNA，转录组研究是基因功能及结构研究的基础和出发点，通过新一代高通量测序，能够全面快速地获得某一物种特定组织或器官在某一状态下的几乎所有转录本序列信息，已广泛应用于基础研究、临床诊断和药物研发等领域。

获得原始测序数据（Pass Filter Data）后，通过如下流程进行生物信息分析：

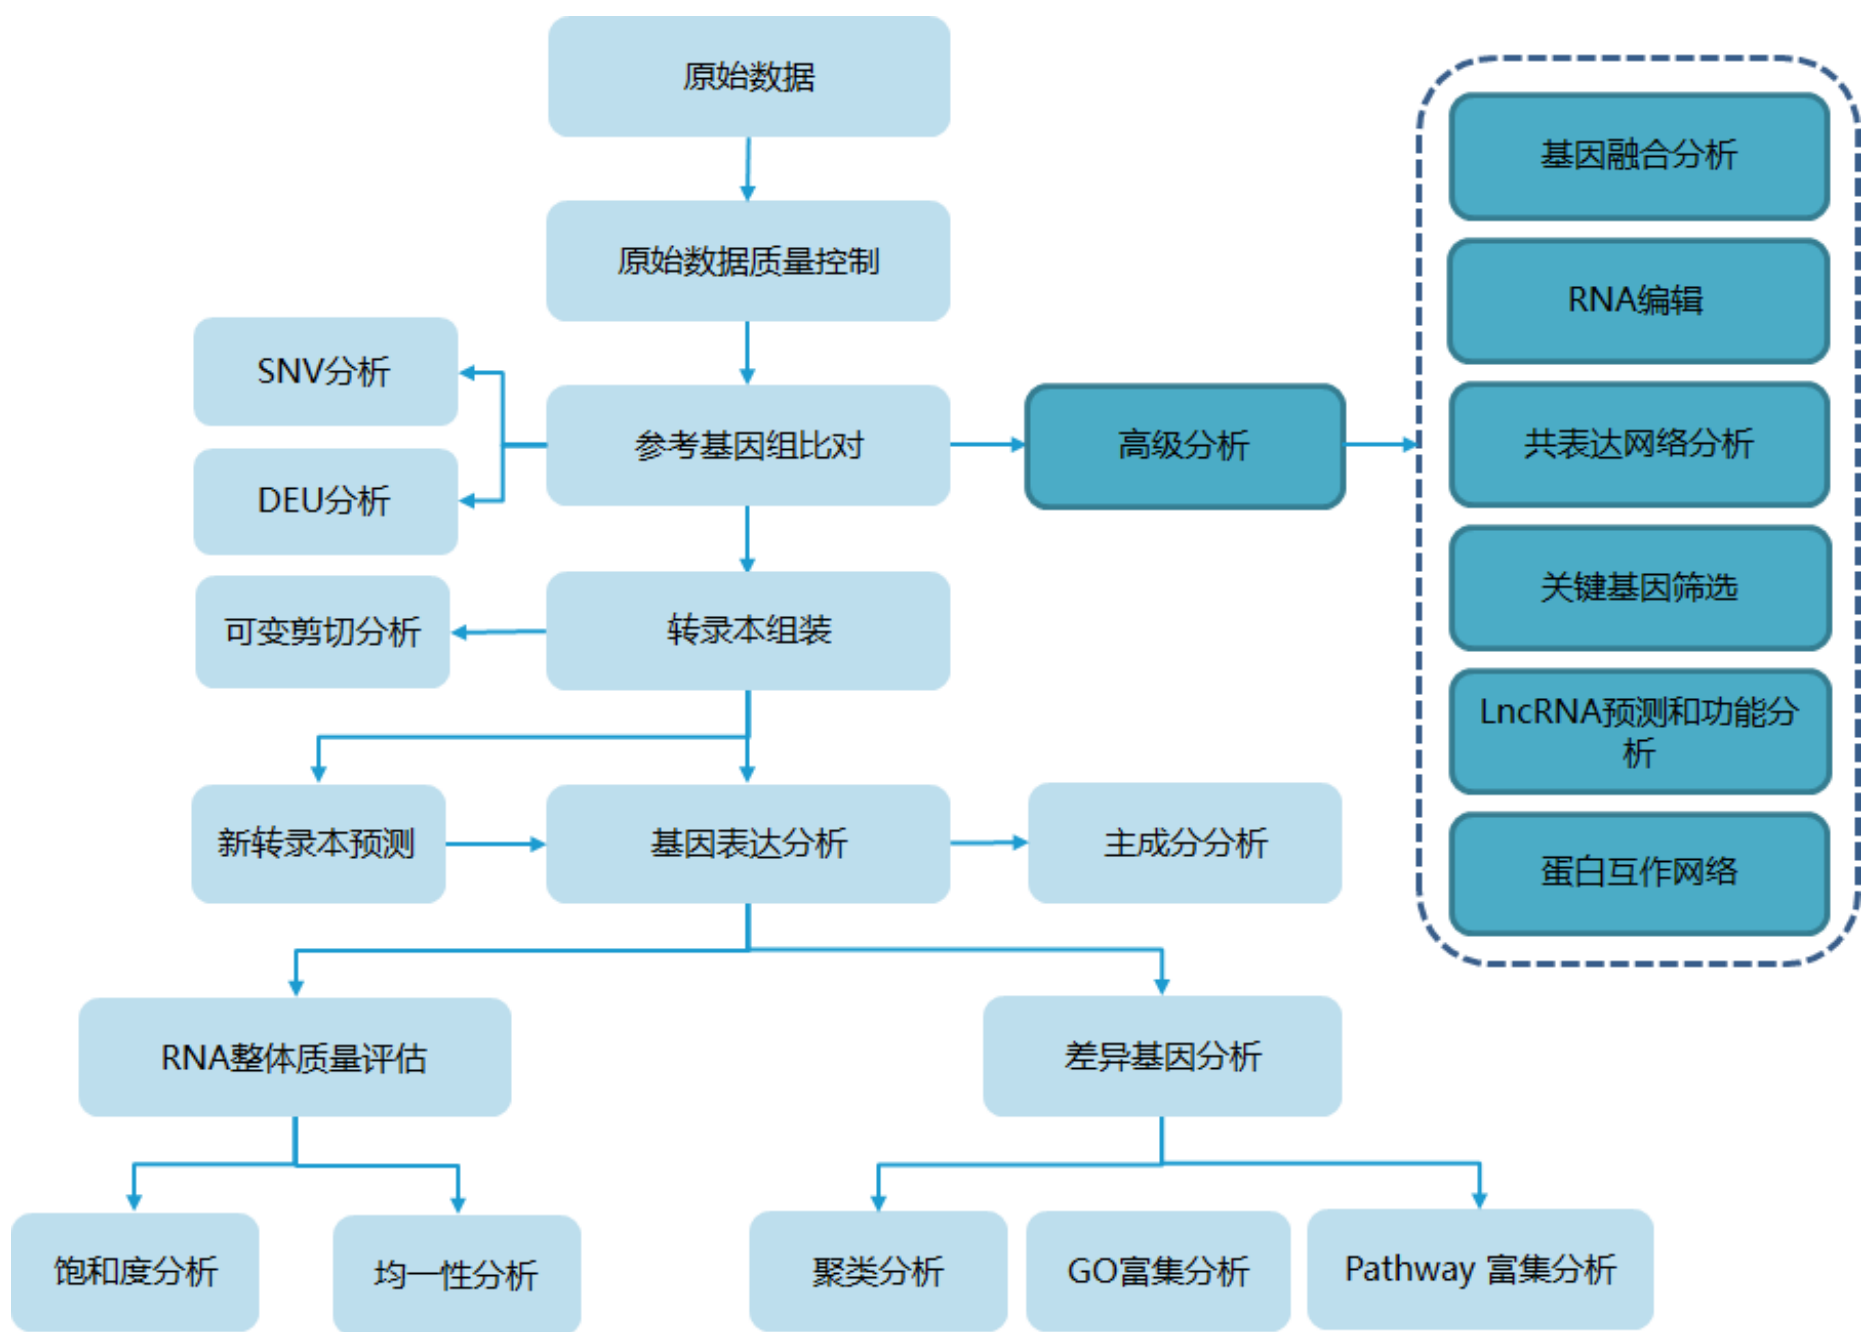

Figure 二.1 转录组数据分析流程

### 三、生物信息分析结果

#### 1 原始序列数据

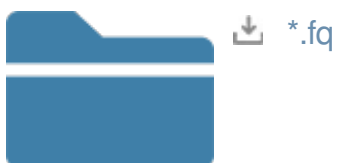

本次实验样本及分组信息:

Table 1.1 Sample list.

| SampleName | SampleName | SampleName | SampleName |
|------------|------------|------------|------------|
| A35-2a     | A35-2b     | A35-2c     | A35-4a     |
| A35-4b     | A35-4c     | A35-6a     | A35-6b     |
| A35-6c     | A7-2a      | A7-2b      | A7-2c      |
| A7-4a      | A7-4b      | A7-4c      | A7-6a      |
| A7-6b      | A7-6c      |            |            |

Table 1.2 Group information.

| Control Group | Sample List                                                    | Experimental Group | Sample List                                           |
|---------------|----------------------------------------------------------------|--------------------|-------------------------------------------------------|
| A7-2          | A7-2a,A7-2b,A7-2c                                              | A7-4               | A7-4a,A7-4b,A7-4c                                     |
| A7-2          | A7-2a,A7-2b,A7-2c                                              | A7-6               | A7-6a,A7-6b,A7-6c                                     |
| A7-4          | A7-4a,A7-4b,A7-4c                                              | A7-6               | A7-6a,A7-6b,A7-6c                                     |
| A35-2         | A35-2a,A35-2b,A35-2c                                           | A35-4              | A35-4a,A35-4b,A35-4c                                  |
| A35-2         | A35-2a,A35-2b,A35-2c                                           | A35-6              | A35-6a,A35-6b,A35-6c                                  |
| A35-4         | A35-4a,A35-4b,A35-4c                                           | A35-6              | A35-6a,A35-6b,A35-6c                                  |
| A35-2         | A35-2a,A35-2b,A35-2c                                           | A7-2               | A7-2a,A7-2b,A7-2c                                     |
| A35-4         | A35-4a,A35-4b,A35-4c                                           | A7-4               | A7-4a,A7-4b,A7-4c                                     |
| A35-6         | A35-6a,A35-6b,A35-6c                                           | A7-6               | A7-6a,A7-6b,A7-6c                                     |
| A35           | A35-2a,A35-2b,A35-2c,A35-4a,A35-4b,A35-4c,A35-6a,A35-6b,A35-6c | A7                 | A7-2a,A7-2b,A7-2c,A7-4a,A7-4b,A7-4c,A7-6a,A7-6b,A7-6c |

列名解释：

- (1) Control Group 对照组名称
- (2) Sample List 对照组样本列表
- (3) Experimental Group 实验组名称
- (4) Sample List 实验组样本列表

对测序结果原始图像数据利用软件Bcl2fastq (v2.17.1.14)进行图像碱基识别 (Base Calling)，初步质量分析 (在测序过程中，Illumina内置软件根据每个测序片段，即read，前25个碱基的质量决定该read是保留还是舍弃)，得到原始测序数据 (Pass Filter Data)，结果以 FASTQ 文件格式存储，其中包含测序序列信息 (FASTQ格式第二行) 及与其对应的测序质量信息 (FASTQ格式第四行)。

FASTQ格式文件中每个read由四行描述，如下：

```
@GWZHISEQ01:289:C3Y96ACXX:6:1101:1704:2425 1:N:0:GGCTAC
GCTCTTTGCCCTTCTCGTCGAAAATTGTCTCCTCATTTCGAACTTCTCTGT
+
@@CFFFDEHHHFIJJ@FHGIIIEHIIJBHHIJJEGIIJJIGHIGHCCF
```

每个序列共有4行，第1行和第3行是序列名称 (有的fq文件为了节省存储空间会省略第三行“+”后面的序列名称)，由测序仪产生；第2行是序列；第4行是序列的测序质量，每个字符对应第2行每个碱基，第四行每个字符对应的ASCII值减去33，即为该碱基的测序质量值，比如@对应的ASCII值为64，那么其对应的碱基质量值是31。从Illumina GA Pipeline v1.8开始 (目前为v1.9)，碱基质量值范围为0到41。

Table 1.3 illumina 测序标识符详细信息。

| Type       | Description                                                            |
|------------|------------------------------------------------------------------------|
| GWZHISEQ01 | Unique instrument name                                                 |
| 289        | Run ID                                                                 |
| C3Y96ACXX  | Flowcell ID                                                            |
| 6          | Flowcell lane                                                          |
| 1101       | Tile number within the flowcell lane                                   |
| 1704       | 'x'-coordinate of the cluster within the tile                          |
| 2424       | 'y'-coordinate of the cluster within the tile                          |
| 1          | Member of a pair, 1 or 2 (paired-end or mate-pair reads only)          |
| N          | Y if the read fails filter (read is bad), N otherwise                  |
| 0          | 0 when none of the control bits are on, otherwise it is an even number |
| GGCTAC     | Index sequence                                                         |

## 2 测序数据质量评估

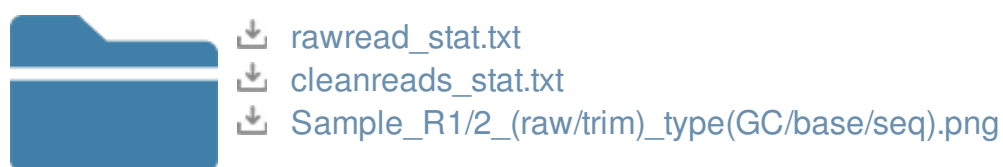

### 2.1 测序数据质量分析

测序碱基质量受测序仪本身、测序试剂以及样品等多个因素共同影响，通常测序序列5'端前几个碱基错误率较高，随着测序序列长度的延伸，3'端碱基错误率会不断升高，这是高通量测序技术特点决定的(Erlich and Mitra, 2008; Jiang et al.)。前6个碱基的位置也会发生较高的测序错误率，而这个长度也正好等于在RNA-seq 建库过程中反转录所需要的随机引物的长度。所以推测前6个碱基测序错误率较高的原因为随机引物和RNA模版的不完全结合(Jiang et al.)。测序错误率分布检查用于检测在测序长度范围内，有无异常的碱基位置存在高错误率，比如中间位置的碱基测序错误率显著高于其他位置。一般情况下，每个碱基位置的测序错误率都应该低于0.5%。如果测序错误率用e表示，illumina HiSeq™/MiSeq的碱基质量值用Qphred表示，则有下列关系：

$$\text{公式一: } Q_{\text{phred}} = -10\log_{10}(e)$$

**Table 2.1.1** illumina Bcl2fastq碱基识别与Phred分值之间的简明对应关系

| Phred Quality Score | Probability of Incorrect Base Call | Base Call Accuracy |
|---------------------|------------------------------------|--------------------|
| 10                  | 1 in 10                            | 90%                |
| 20                  | 1 in 100                           | 99%                |
| 30                  | 1 in 1000                          | 99.9%              |
| 40                  | 1 in 10000                         | 99.99%             |
| 50                  | 1 in 100000                        | 100%               |

测序数据质量评估采用软件FastQC (v0.10.1) 进行分析。

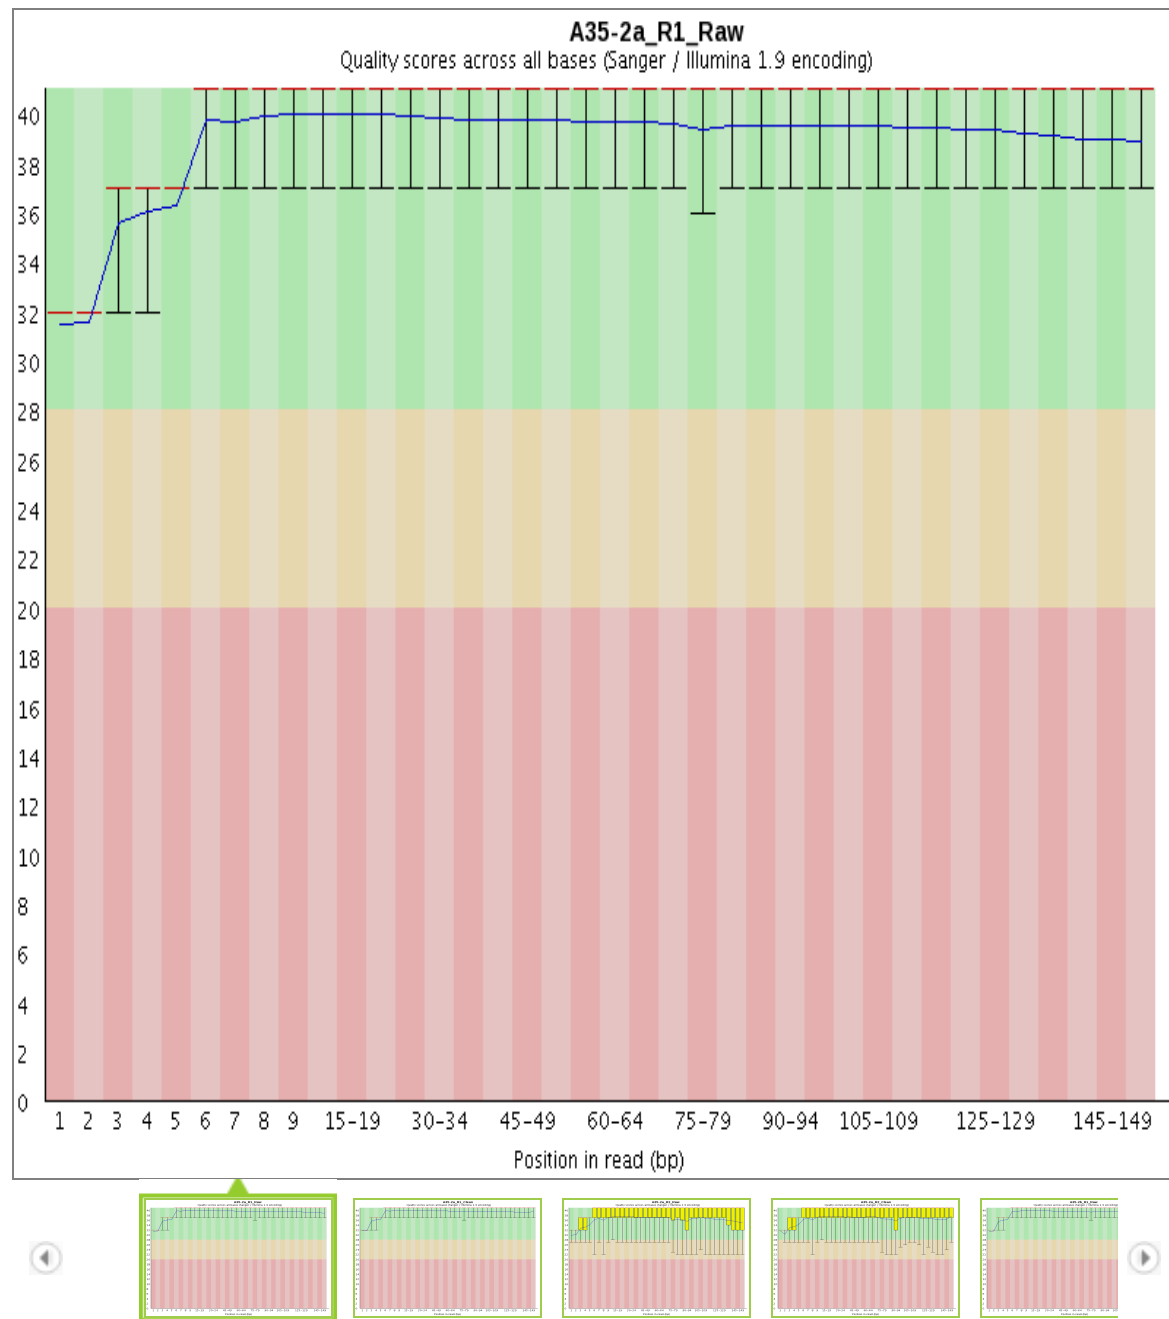

**Figure 2.1.1** 样品碱基位置质量分数分布情况展示，其中横坐标为每条reads的相对碱基位点，纵坐标代表测序质量分数，分数越高碱基越可信，一般碱基的质量值为13,错误率为5%，质量值为20错误率为1%，质量值为30的错误率为0.1%。

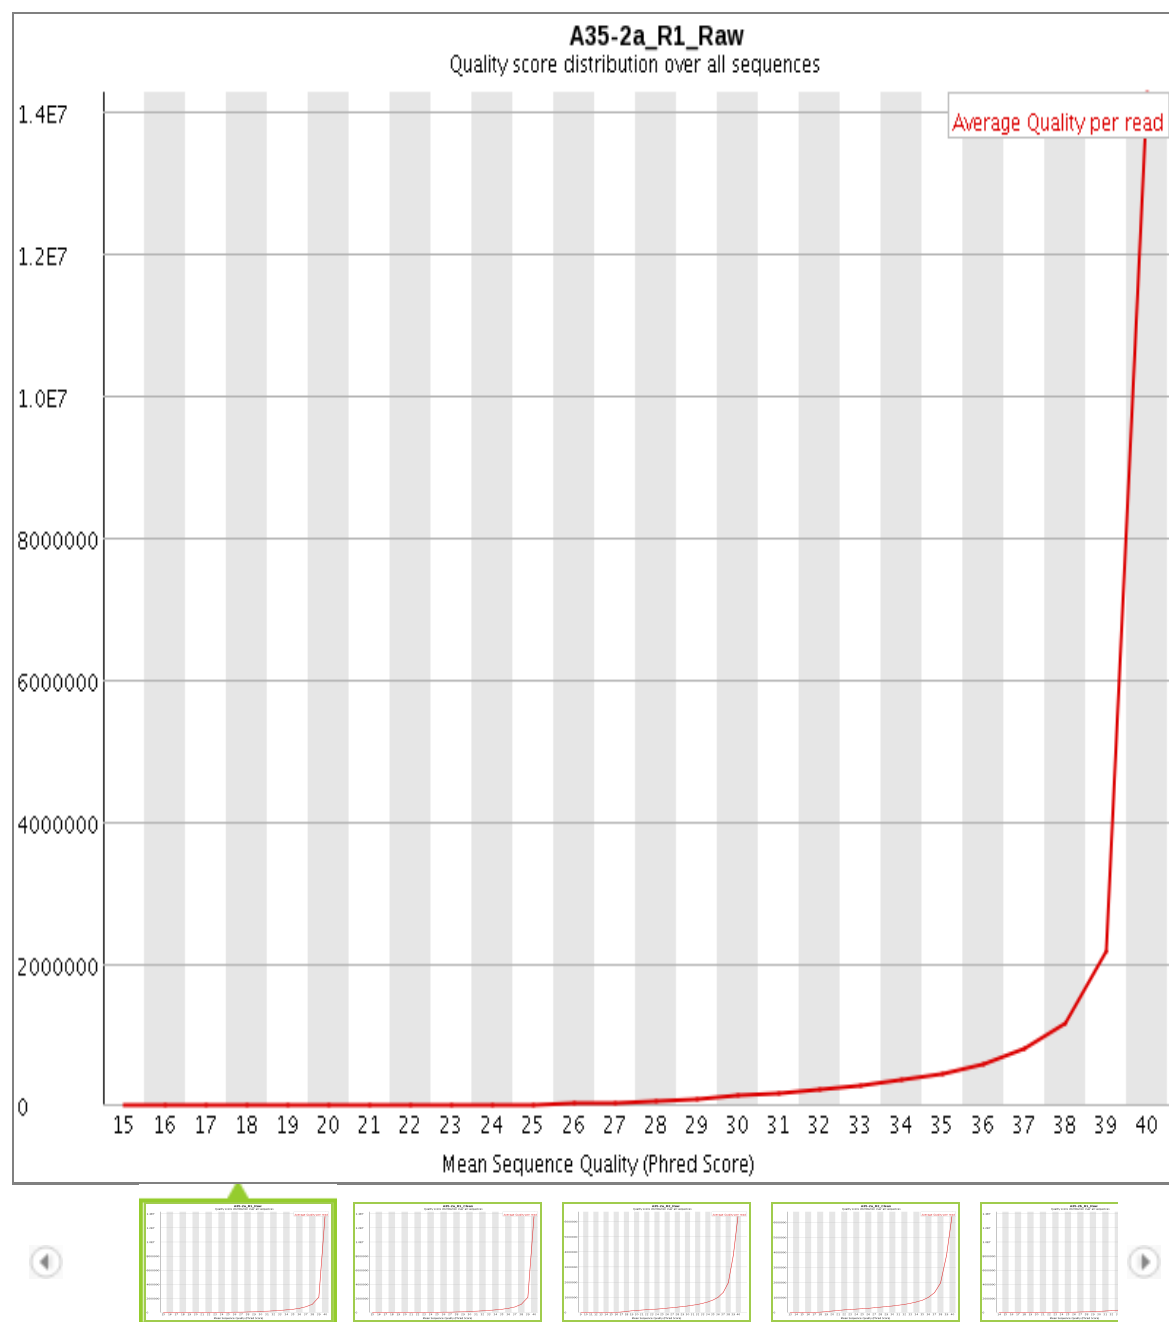

**Figure 2.1.2** 样品碱基序列平均质量分布情况，横坐标为序列平均碱基质量值，纵坐标代表序列数量，从图上可以看到绝大部分碱基序列的平均质量值峰值，该值一般大于30，可以判断序列质量较好。

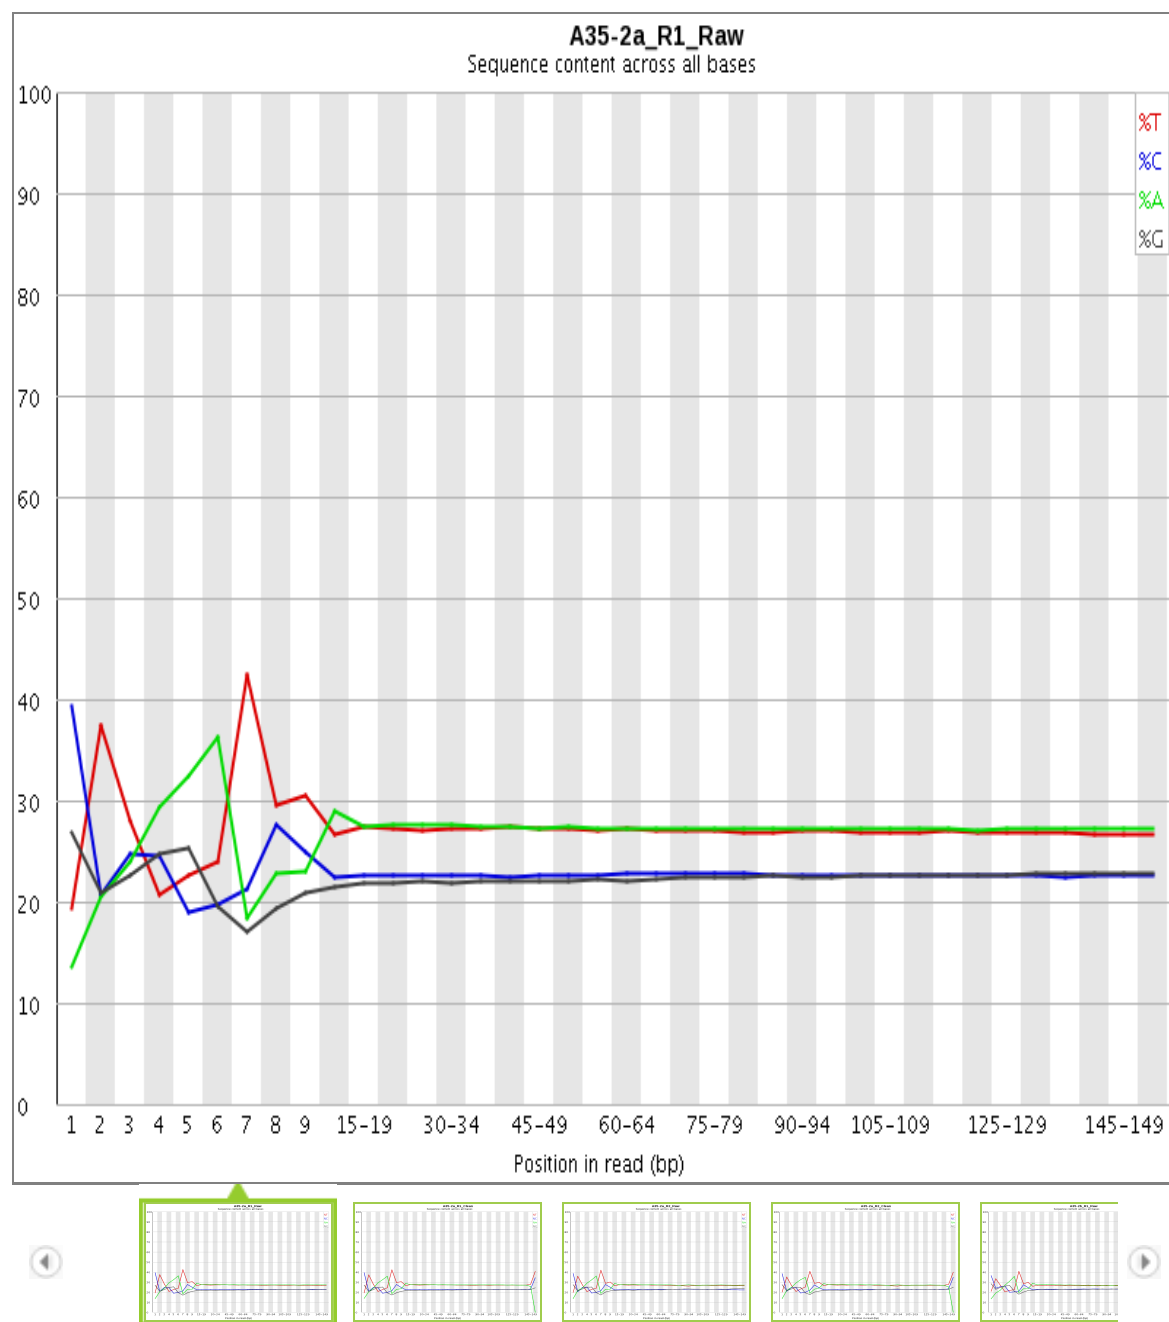

**Figure 2.1.3** GC含量分布检查用于检测有无AT、GC 分离现象，横坐标为reads的碱基位置，纵坐标为单碱基所占的比例；不同颜色代表不同的碱基类型。

## 2.2 测序数据过滤

在测序过程中，有少量reads被测到接头序列，或者由于测序长度过大导致reads的3端bases质量过低的现象，这些数据会对后续的分析结果产生负面的影响。因此，需要对原始数据进行预处理，对低质量数据进行过滤，去除污染及接头序列。

软件：Cutadapt (version 1.9.1)

方法说明：

- (1) 去除接头(adapter)序列；
- (2) 去除5'或3'末端质量值低于20或者含N的碱基；
- (3) 去除trim后reads长度低于75bp的序列。

各样品测序原始数据统计如下表：

**Table 2.2.1** 测序原始数据质量统计

| Sample | length | Reads    | Bases      | Q20 (%) | Q30 (%) | GC (%) | N (ppm) |
|--------|--------|----------|------------|---------|---------|--------|---------|
| A35-2a | 150.00 | 42016114 | 6302417100 | 96.05   | 90.97   | 45.55  | 86.98   |
| A35-2b | 150.00 | 43074524 | 6461178600 | 95.85   | 90.53   | 46.57  | 77.89   |
| A35-2c | 150.00 | 51779906 | 7766985900 | 96.00   | 90.83   | 47.37  | 90.01   |
| A35-4a | 150.00 | 40314804 | 6047220600 | 97.26   | 93.30   | 47.13  | 27.36   |
| A35-4b | 150.00 | 40607384 | 6091107600 | 96.29   | 91.39   | 45.69  | 88.01   |
| A35-4c | 150.00 | 64859306 | 9728895900 | 97.13   | 93.02   | 45.41  | 42.90   |
| A35-6a | 150.00 | 63415536 | 9512330400 | 97.06   | 92.84   | 47.11  | 42.83   |
| A35-6b | 150.00 | 35975622 | 5396343300 | 96.22   | 91.31   | 45.71  | 11.42   |
| A35-6c | 150.00 | 40018416 | 6002762400 | 97.03   | 92.81   | 48.62  | 28.30   |
| A7-2a  | 150.00 | 61643564 | 9246534600 | 96.16   | 90.90   | 44.43  | 4.60    |
| A7-2b  | 150.00 | 53099460 | 7964919000 | 96.19   | 90.96   | 45.04  | 4.63    |
| A7-2c  | 150.00 | 66399164 | 9959874600 | 96.40   | 91.33   | 45.01  | 4.52    |
| A7-4a  | 150.00 | 53880184 | 8082027600 | 96.00   | 90.58   | 46.06  | 4.55    |
| A7-4b  | 150.00 | 47427190 | 7114078500 | 96.17   | 91.11   | 45.61  | 74.71   |
| A7-4c  | 150.00 | 46128656 | 6919298400 | 96.22   | 91.26   | 45.86  | 86.01   |
| A7-6a  | 150.00 | 40886784 | 6133017600 | 97.18   | 93.13   | 46.48  | 20.30   |
| A7-6b  | 150.00 | 44831112 | 6724666800 | 95.89   | 90.64   | 46.24  | 87.56   |
| A7-6c  | 150.00 | 48869158 | 7330373700 | 96.32   | 91.34   | 46.41  | 53.52   |

各样品测序数据过滤后统计如下表：

Table 2.2.2 过滤后数据质量统计

| Sample | length | Reads    | Bases      | Q20 (%) | Q30 (%) | GC (%) | N (ppm) |
|--------|--------|----------|------------|---------|---------|--------|---------|
| A35-2a | 148.45 | 41668866 | 6185685718 | 96.49   | 91.57   | 45.56  | 27.00   |
| A35-2b | 147.93 | 42685424 | 6314286134 | 96.32   | 91.18   | 46.56  | 25.10   |
| A35-2c | 148.25 | 51335092 | 7610571053 | 96.46   | 91.46   | 47.37  | 28.35   |
| A35-4a | 148.78 | 40149578 | 5973616868 | 97.53   | 93.67   | 47.18  | 15.24   |
| A35-4b | 148.36 | 40312024 | 5980721139 | 96.68   | 91.93   | 45.70  | 28.49   |
| A35-4c | 148.67 | 64609700 | 9605749123 | 97.39   | 93.38   | 45.44  | 39.23   |
| A35-6a | 148.41 | 63135762 | 9370242608 | 97.35   | 93.23   | 47.14  | 39.04   |
| A35-6b | 148.81 | 35676040 | 5309056985 | 96.70   | 91.96   | 45.72  | 4.49    |
| A35-6c | 148.85 | 39818710 | 5926988533 | 97.34   | 93.23   | 48.68  | 15.93   |
| A7-2a  | 148.37 | 61149382 | 9072735440 | 96.71   | 91.66   | 44.43  | 3.29    |
| A7-2b  | 148.29 | 52685944 | 7812842489 | 96.74   | 91.72   | 45.04  | 3.34    |
| A7-2c  | 148.42 | 65943616 | 9787577914 | 96.90   | 92.01   | 45.02  | 3.25    |
| A7-4a  | 148.35 | 53413584 | 7923937503 | 96.59   | 91.39   | 46.07  | 3.25    |
| A7-4b  | 148.67 | 47088076 | 7000791610 | 96.57   | 91.66   | 45.63  | 23.62   |
| A7-4c  | 148.67 | 45787236 | 6806968424 | 96.62   | 91.81   | 45.88  | 26.15   |
| A7-6a  | 148.80 | 40729736 | 6060644045 | 97.43   | 93.48   | 46.53  | 11.89   |
| A7-6b  | 148.44 | 44435570 | 6595796642 | 96.36   | 91.27   | 46.25  | 26.86   |
| A7-6c  | 148.57 | 48520882 | 7208815045 | 96.70   | 91.86   | 46.43  | 17.57   |

列名解释：

- (1) Sample: 测序样品名称。
- (2) length: 平均长度。
- (3) Reads: 测序reads数量。
- (4) Bases: 总碱基数量。
- (5) Q20、Q30：分别计算Phred数值大于20、30的碱基占总体碱基的百分比。
- (6) GC%：计算碱基G和C的数量总和和占总的碱基数量的百分比。
- (7) N(ppm)：每百万碱基中N的数量。

### 3 参考序列比对分析

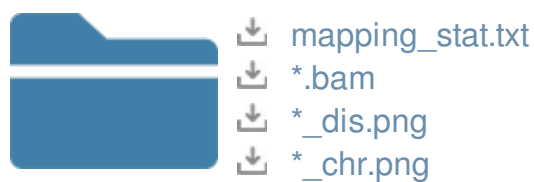

#### 3.1 clean data与参考基因组比对分析

将过滤后的测序Clean Data与参考基因组进行比对分析，选择合适的参考基因组对项目信息分析的成功至关重要，数据比对率一定程度可以反映实验测序样品与选择的参考基因组相似性关系。

采用Hisat2(v2.0.1)软件进行短reads的比对，默认参数。

Table 3.1.1 Clean reads 比对到参考基因组上情况

| Samples | Total reads | Total mapped           | Multiple mapped        | Uniquely mapped        | Read1    | Read2    | Reads map to '+' | Reads map to '-' | Non_splice reads | Splice reads | Reads mapped in proper pairs |
|---------|-------------|------------------------|------------------------|------------------------|----------|----------|------------------|------------------|------------------|--------------|------------------------------|
| A35-2a  | 41668866    | 37590590<br>(90.2127%) | 2666714<br>(6.39978%)  | 34923876<br>(83.8129%) | 18198169 | 16725707 | 17451949         | 17471927         | 20964773         | 13959103     | 32737650                     |
| A35-2b  | 42685424    | 36303070<br>(85.0479%) | 4740563<br>(11.1058%)  | 31562507<br>(73.9421%) | 16459954 | 15102553 | 15763743         | 15798764         | 19847405         | 11715102     | 29529136                     |
| A35-2c  | 51335092    | 43466985<br>(84.673%)  | 5956991<br>(11.6041%)  | 37509994<br>(73.0689%) | 19532986 | 17977008 | 18730389         | 18779605         | 23043912         | 14466082     | 35151510                     |
| A35-4a  | 40149578    | 36658511<br>(91.3048%) | 4420508<br>(11.0101%)  | 32238003<br>(80.2947%) | 16410570 | 15827433 | 16082467         | 16155536         | 20364023         | 11873980     | 30501262                     |
| A35-4b  | 40312024    | 36527997<br>(90.6132%) | 3917213<br>(9.71723%)  | 32610784<br>(80.8959%) | 16940206 | 15670578 | 16293362         | 16317422         | 20937920         | 11672864     | 30586404                     |
| A35-4c  | 64609700    | 59941034<br>(92.774%)  | 6645450<br>(10.2855%)  | 53295584<br>(82.4885%) | 27108395 | 26187189 | 26627351         | 26668233         | 33630622         | 19664962     | 51002774                     |
| A35-6a  | 63135762    | 54364474<br>(86.1073%) | 11212218<br>(17.7589%) | 43152256<br>(68.3484%) | 21951710 | 21200546 | 21534219         | 21618037         | 29343867         | 13808389     | 41074662                     |
| A35-6b  | 35676040    | 32933586<br>(92.3129%) | 4582496<br>(12.8447%)  | 28351090<br>(79.4682%) | 14579527 | 13771563 | 14127997         | 14223093         | 19087618         | 9263472      | 26689824                     |
| A35-6c  | 39818710    | 36000737<br>(90.4116%) | 5775073<br>(14.5034%)  | 30225664<br>(75.9082%) | 15407636 | 14818028 | 15056942         | 15168722         | 21079442         | 9146222      | 28417272                     |
| A7-2a   | 61149382    | 56477437<br>(92.3598%) | 3154377<br>(5.15848%)  | 53323060<br>(87.2013%) | 27304861 | 26018199 | 26632611         | 26690449         | 33029822         | 20293238     | 50916418                     |
| A7-2b   | 52685944    | 47416555<br>(89.9985%) | 4138614<br>(7.85525%)  | 43277941<br>(82.1432%) | 22142043 | 21135898 | 21613568         | 21664373         | 27116443         | 16161498     | 41387844                     |
| A7-2c   | 65943616    | 60102169<br>(91.1418%) | 4652240<br>(7.05488%)  | 55449929<br>(84.0869%) | 28305023 | 27144906 | 27691887         | 27758042         | 34283114         | 21166815     | 53147404                     |
| A7-4a   | 53413584    | 49110730<br>(91.9443%) | 6390438<br>(11.9641%)  | 42720292<br>(79.9802%) | 21907077 | 20813215 | 21314900         | 21405392         | 27385106         | 15335186     | 40568056                     |
| A7-4b   | 47088076    | 42922569<br>(91.1538%) | 4747228<br>(10.0816%)  | 38175341<br>(81.0722%) | 19832223 | 18343118 | 19059894         | 19115447         | 23804083         | 14371258     | 35805320                     |
| A7-4c   | 45787236    | 41579551<br>(90.8104%) | 5567452<br>(12.1594%)  | 36012099<br>(78.651%)  | 18732956 | 17279143 | 17966671         | 18045428         | 23433484         | 12578615     | 33684158                     |
| A7-6a   | 40729736    | 37631104<br>(92.3922%) | 5893197<br>(14.469%)   | 31737907<br>(77.9232%) | 16158300 | 15579607 | 15810987         | 15926920         | 21354591         | 10383316     | 30232328                     |
| A7-6b   | 44435570    | 40278198<br>(90.644%)  | 6990346<br>(15.7314%)  | 33287852<br>(74.9126%) | 17387475 | 15900377 | 16593288         | 16694564         | 22328699         | 10959153     | 31003618                     |
| A7-6c   | 48520882    | 44381381<br>(91.4686%) | 7628482<br>(15.7221%)  | 36752899<br>(75.7466%) | 19006462 | 17746437 | 18319899         | 18433000         | 24204235         | 12548664     | 34558986                     |

## 列名解释：

- (1) Total reads：测序序列经过测序数据过滤后的数量统计(Clean data)。
- (2) Total mapped：能定位到基因组上的测序序列的数量的统计；一般情况下，如果不存在污染并且参考基因组选择合适的情况下，这部分数据的百分比大于70%。
- (3) Multiple mapped：在参考序列上有多个比对位置的测序序列的数量统计；这部分数据的百分比一般会小于10%。
- (4) Uniquely mapped：在参考序列上有唯一比对位置的测序序列的数量统计。
- (5) Reads map to '+', Reads map to '-'：测序序列比对到基因组上正链和负链的统计。
- (6) Splice reads：(2)中，分段比对到两个外显子上的测序序列(也称为Junction reads)的统计，Non-splice reads为整段比对到外显子的将测序序列的统计，Splice reads的百分比取决于测序片段的长度。
- (7) Reads mapped in proper pairs: 双端测序序列比对到染色体上合理的方向和位置。

## 3.2 Reads在参考基因组不同区域的分布情况

对Total mapped reads比对到基因组上的各个部分的情况进行统计，定位区域分为exon (外显子)、intron (内含子) 和intergenic (基因间隔区域)。定位到Intron (内含子) 区域的测序序列可能是由于非成熟的mRNA 的污染或者基因组注释不完全导致的，而定位到Intergenic(基因间隔区域)的测序序列可能是因为基因组注释不完全以及背景噪音。



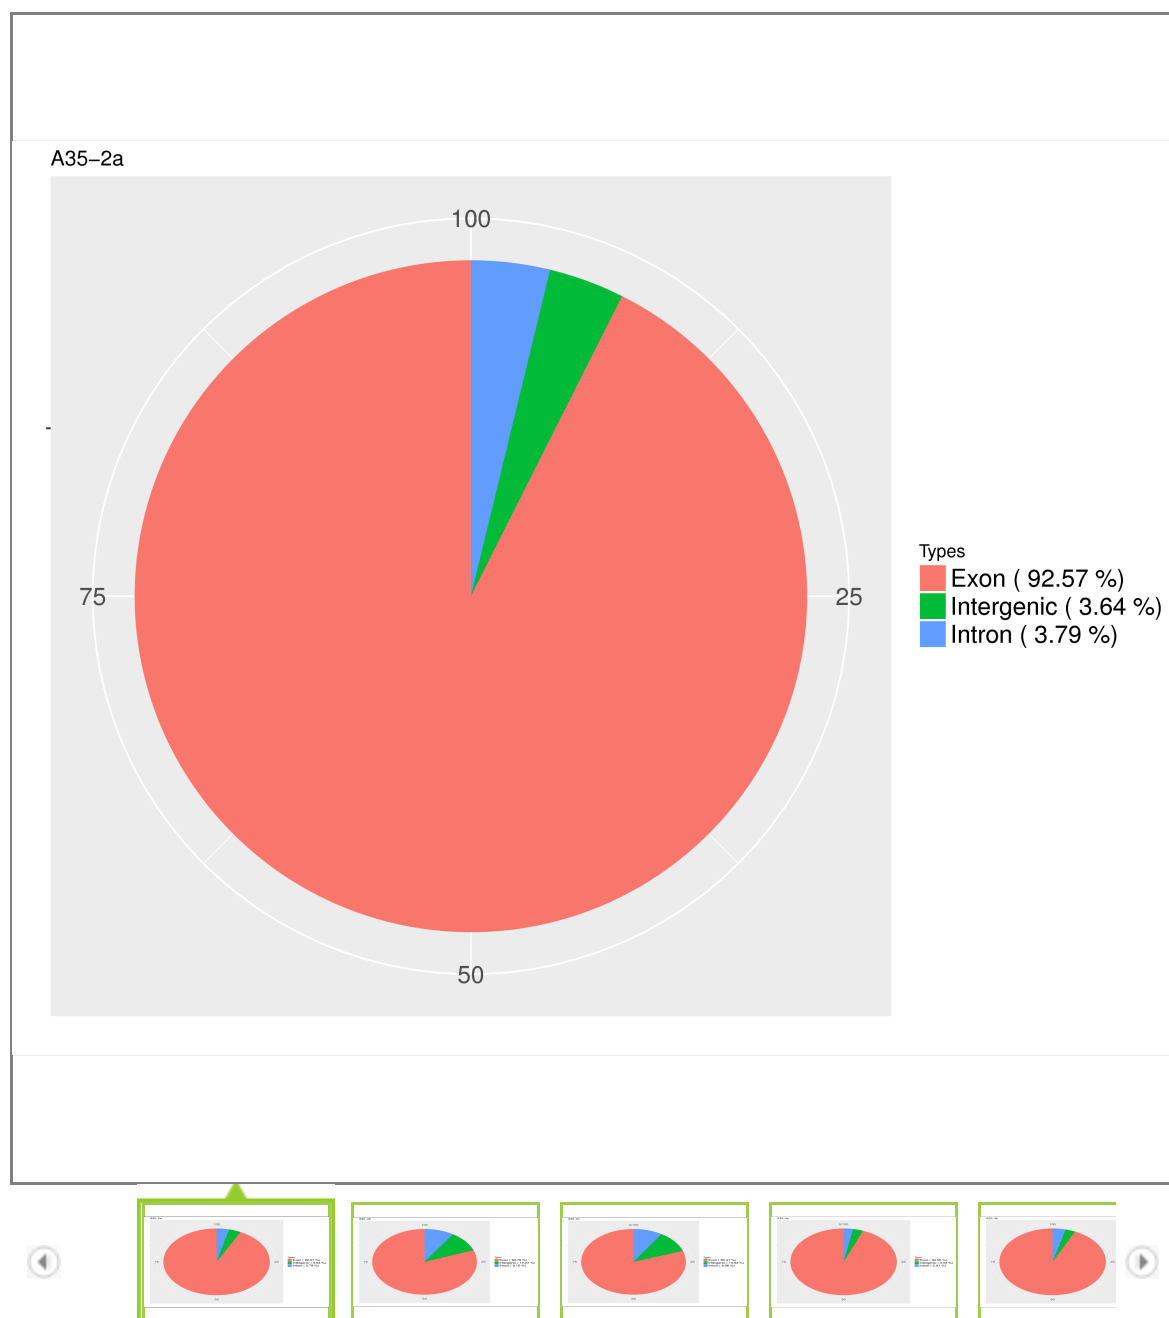

Figure 3.2.1 Reads在参考基因组不同区域的分布情况

### 3.3 Reads在染色体上的密度分布情况

对 Total mapped reads 比对到基因组上的各个染色体进行统计，如下图所示。具体作图的方法为计算窗口内部比对到碱基位置上的reads 数目，并计算其在染色体上的深度分布，并取log2值。正常情况下，整个染色体长度越长，该染色体内部定位的reads 总数会越多(Marquez et al.)。从定位到染色体上的reads 数目与染色体长度的关系图中，可以更加直观看出测序的均匀度。

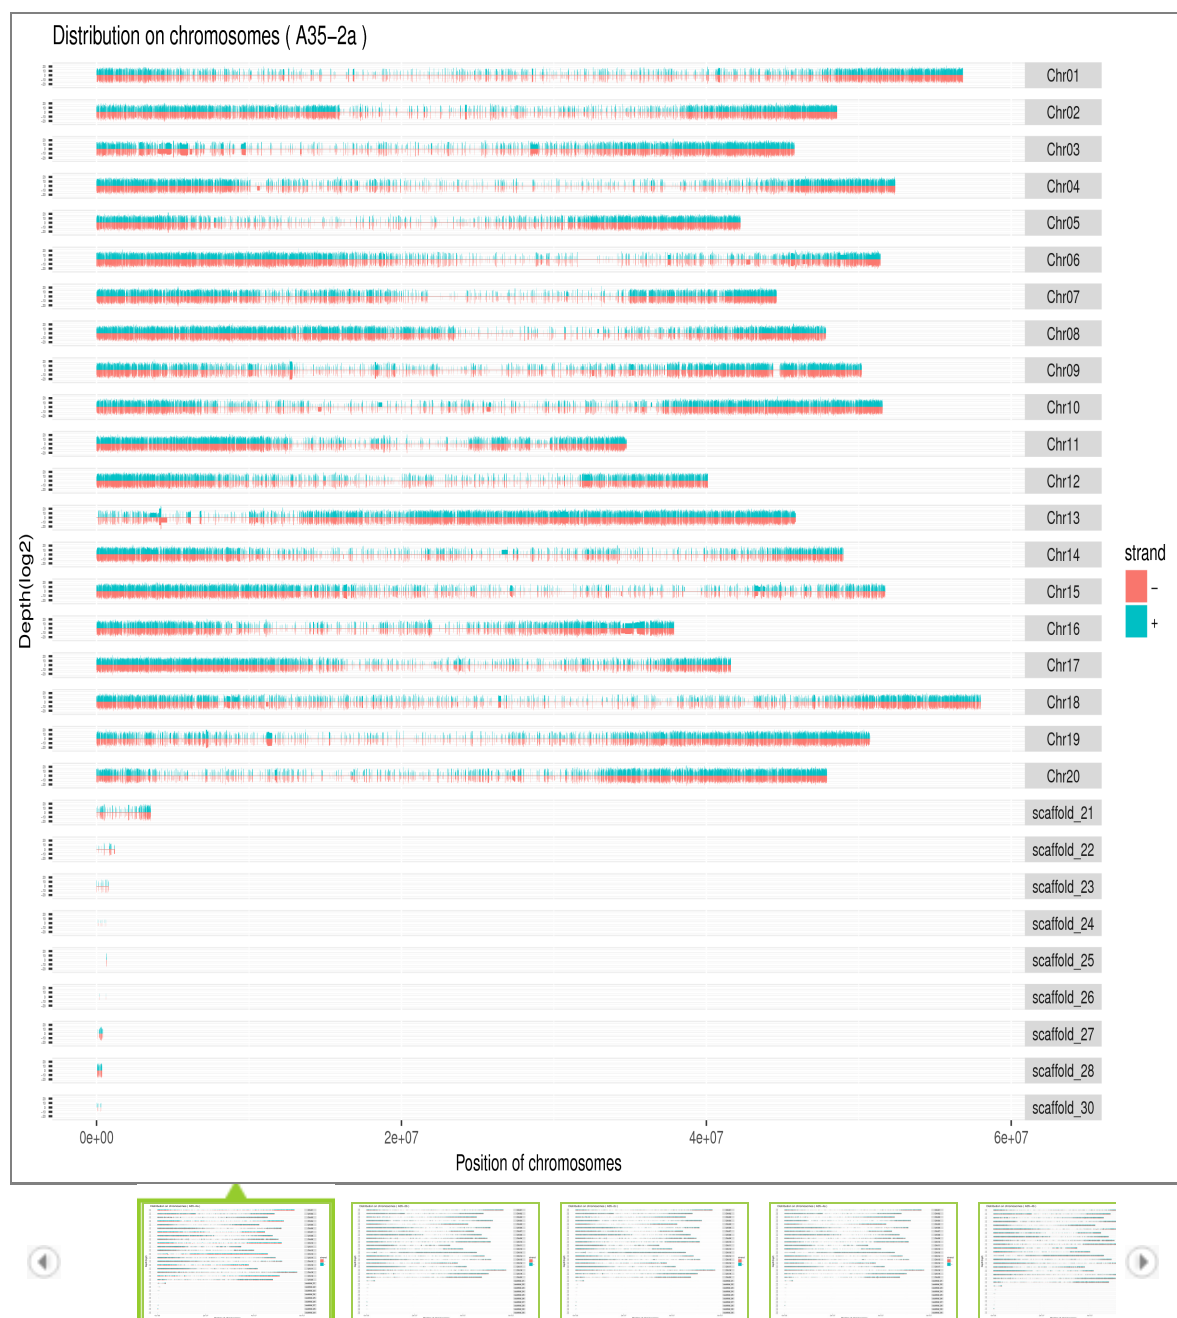

Figure 3.3.1 Reads在染色体上的密度分布图，纵坐标为序列在染色体上的深度分布并取log2值，横坐标为染色体的长度。

### 3.4 Reads比对结果可视化

我们提供 RNA-seq Reads 在基因组上比对结果的bam 格式文件，并推荐使用IGV (Integrative Genomics Viewer) 浏览器对bam 文件进行可视化浏览。IGV浏览器可在不同尺度上显示基因不同区域的丰度，以反映不同区域的转录水平。

[IGV下载](#)

[IGV操作手册](#)

IGV使用方法：

- (1) 上传参考基因组方法：选择 Genomes>Load Genome From File，常见的模式生物，例如人的可以直接从下拉列表里选择参考基因组。不常见的物种染色体组，我们会提供染色体组的下载地址，客户可采取下载完毕后，从文件菜单中选择载入；
- (2) 上传与基因上比对结果的bam 格式文件：选择File > Load From File，依次选择各样品的排序后bam文件导入即可；
- (3) 在工具栏第二个条目选择要查看的参考基因，结果如下：

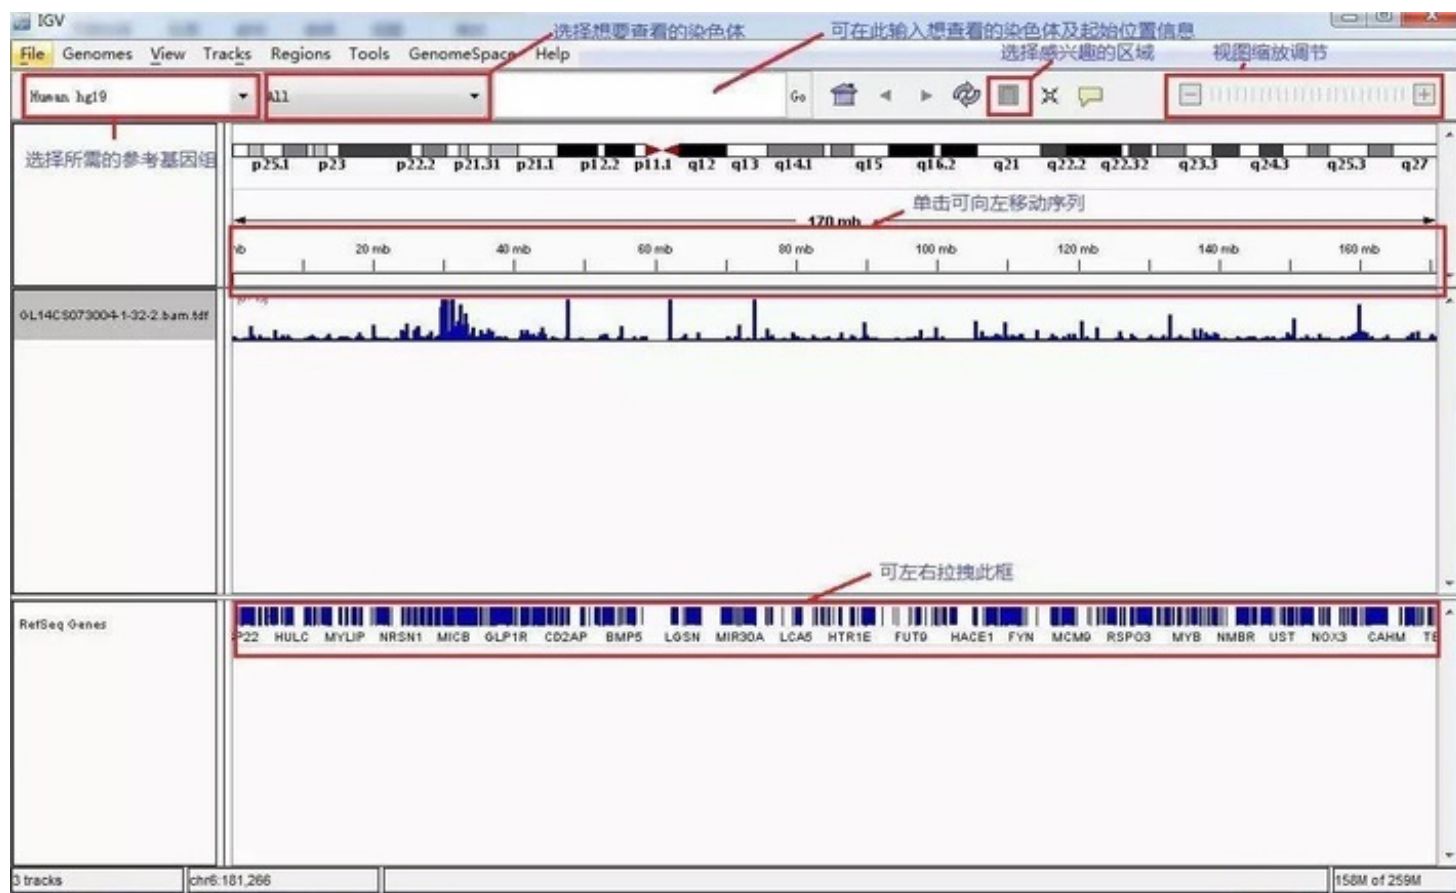

Figure 3.4.1 IGV浏览器界面

#### 4 可变剪切分析

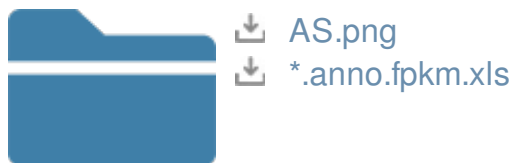

可变剪接使一个基因产生多个mRNA转录本，不同mRNA可能翻译成不同蛋白。因此，通过可变剪接一个基因可能产生多个蛋白，极大地增加了蛋白多样性 (Black, 2003 ; Stamm, 2005 ; Lareau, 2004) 。虽然已知可变剪接在真核生物中普遍存在，但我们可能仍低估了可变剪接的比例，最近，基于高通量测序的可变剪接研究在人 (Pan, 2008 ; Wang, 2008 ; Sultan, 2008) 、小鼠 (Tang, 2009 ; Mortazavi, 2008) 、拟南芥 (Filichkin) 中发现了很多新的可变剪接事件。

用 ASprofile (V1.0.4) 软件对StringTie(v1.0.4)(Nature Biotechnology 2015 ; Perteau M, et al.) 预测出的转录本进行可变剪切事件分别进行分类和表达量统计。ASprofile 中的可变剪切事件分类如下图所示：

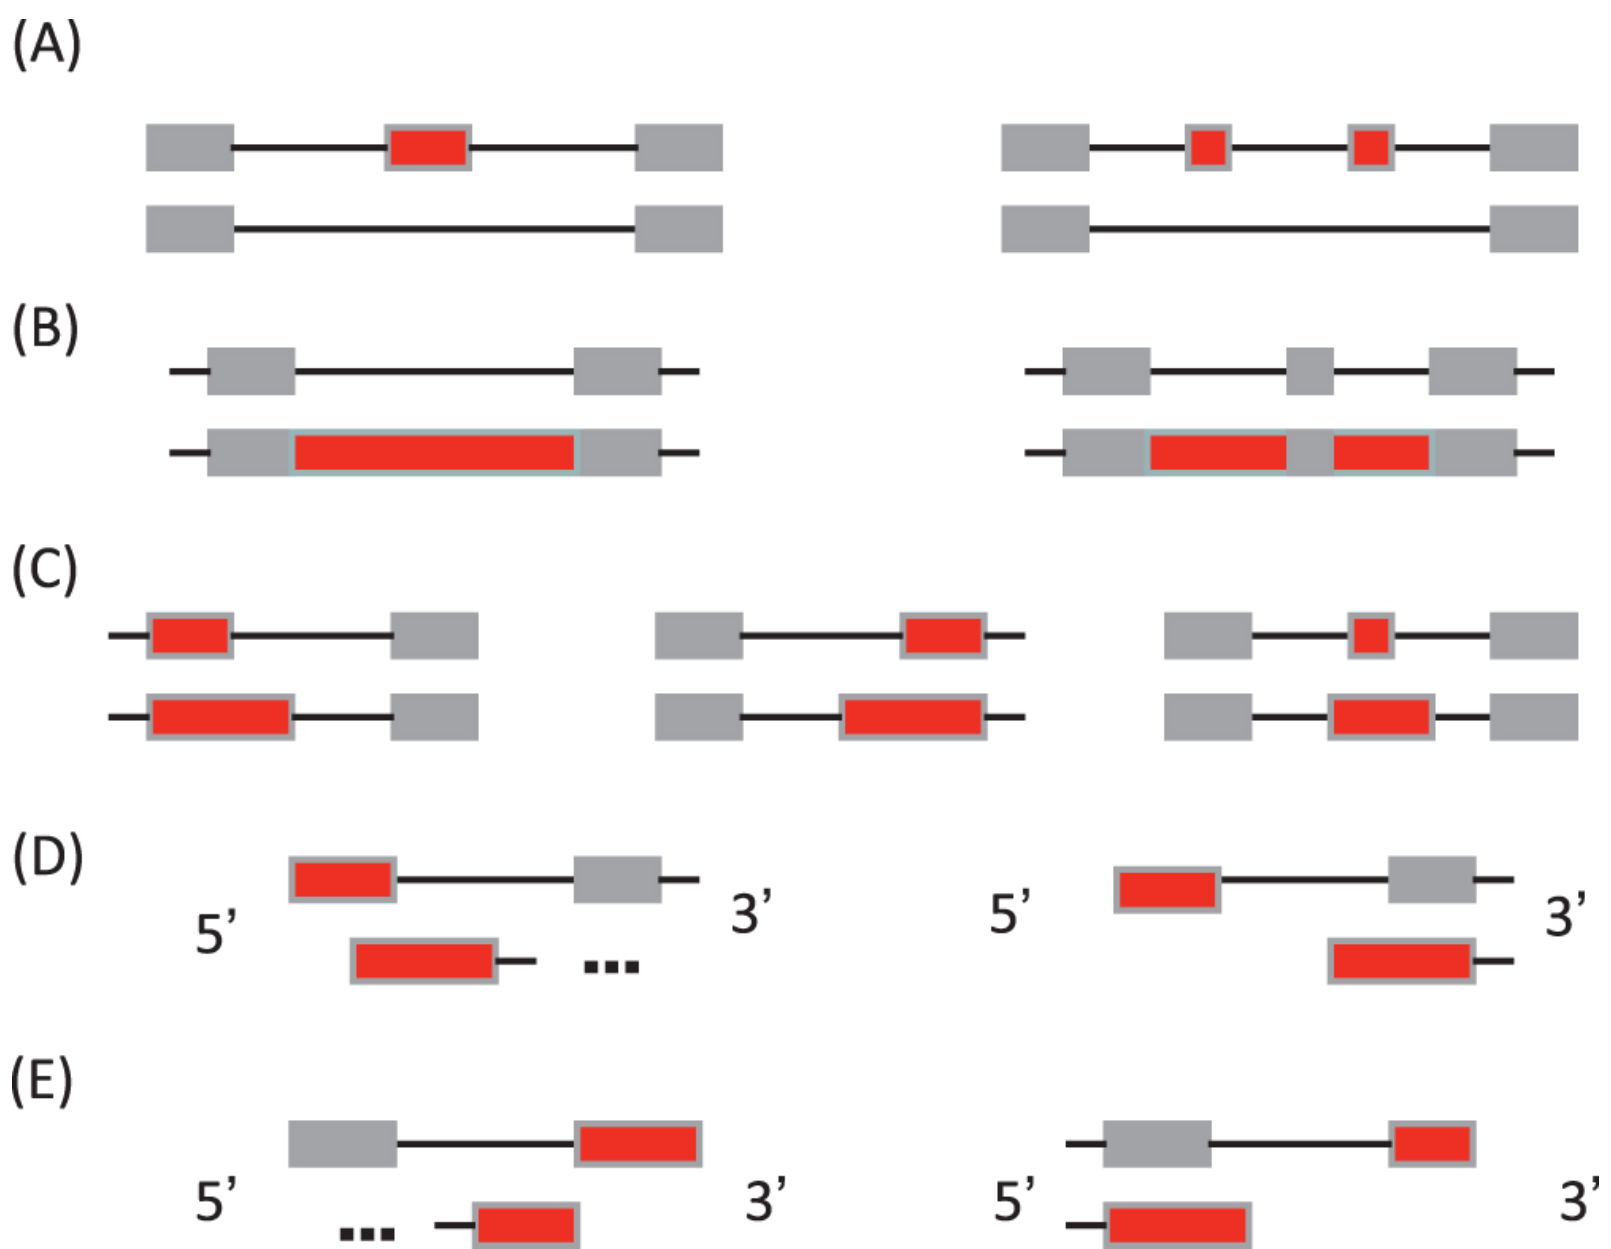

**Figure 4.1** 基本可变剪切事件：(A) SKIP，MSKIP；(B) IR，MIR；(C) AE；(D) TSS；(E) TTS. 可变剪切部分被标记为红色。

- (A) SKIP: Skipped exon (SKIP\_ON,SKIP\_OFF pair) 单外显子跳跃  
 XSKIP: Approximate SKIP (XSKIP\_ON,XSKIP\_OFF pair) 单外显子跳跃 (模糊边界)  
 MSKIP: Multi-exon SKIP (MSKIP\_ON,MSKIP\_OFF pair) 多外显子跳跃  
 XMSKIP: Approximate MSKIP (XMSKIP\_ON,XMSKIP\_OFF pair) 多外显子跳跃 (模糊边界)
- (B) IR: Intron retention (IR\_ON, IR\_OFF pair) 单内含子滞留  
 XIR: Approximate IR (XIR\_ON, XIR\_OFF pair) 单内含子滞留 (模糊边界)  
 MIR: Multi-IR (MIR\_ON, MIR\_OFF pair) 多内含子滞留  
 XMIR: Approximate MIR (XMIR\_ON, XMIR\_OFF pair) 多内含子滞留 (模糊边界)
- (C) AE: Alternative exon ends (5', 3', or both) 可变 5'或3'端剪切  
 XAE: Approximate AE 可变 5'或3'端剪切 (模糊边界)
- (D) TSS: Alternative 5' first exon (transcription start site) 第一个外显子可变剪切
- (E) TTS: Alternative 3' last exon (transcription terminal site) 最后一个外显子可变剪切

#### 4.1 可变剪切事件分类和数量统计

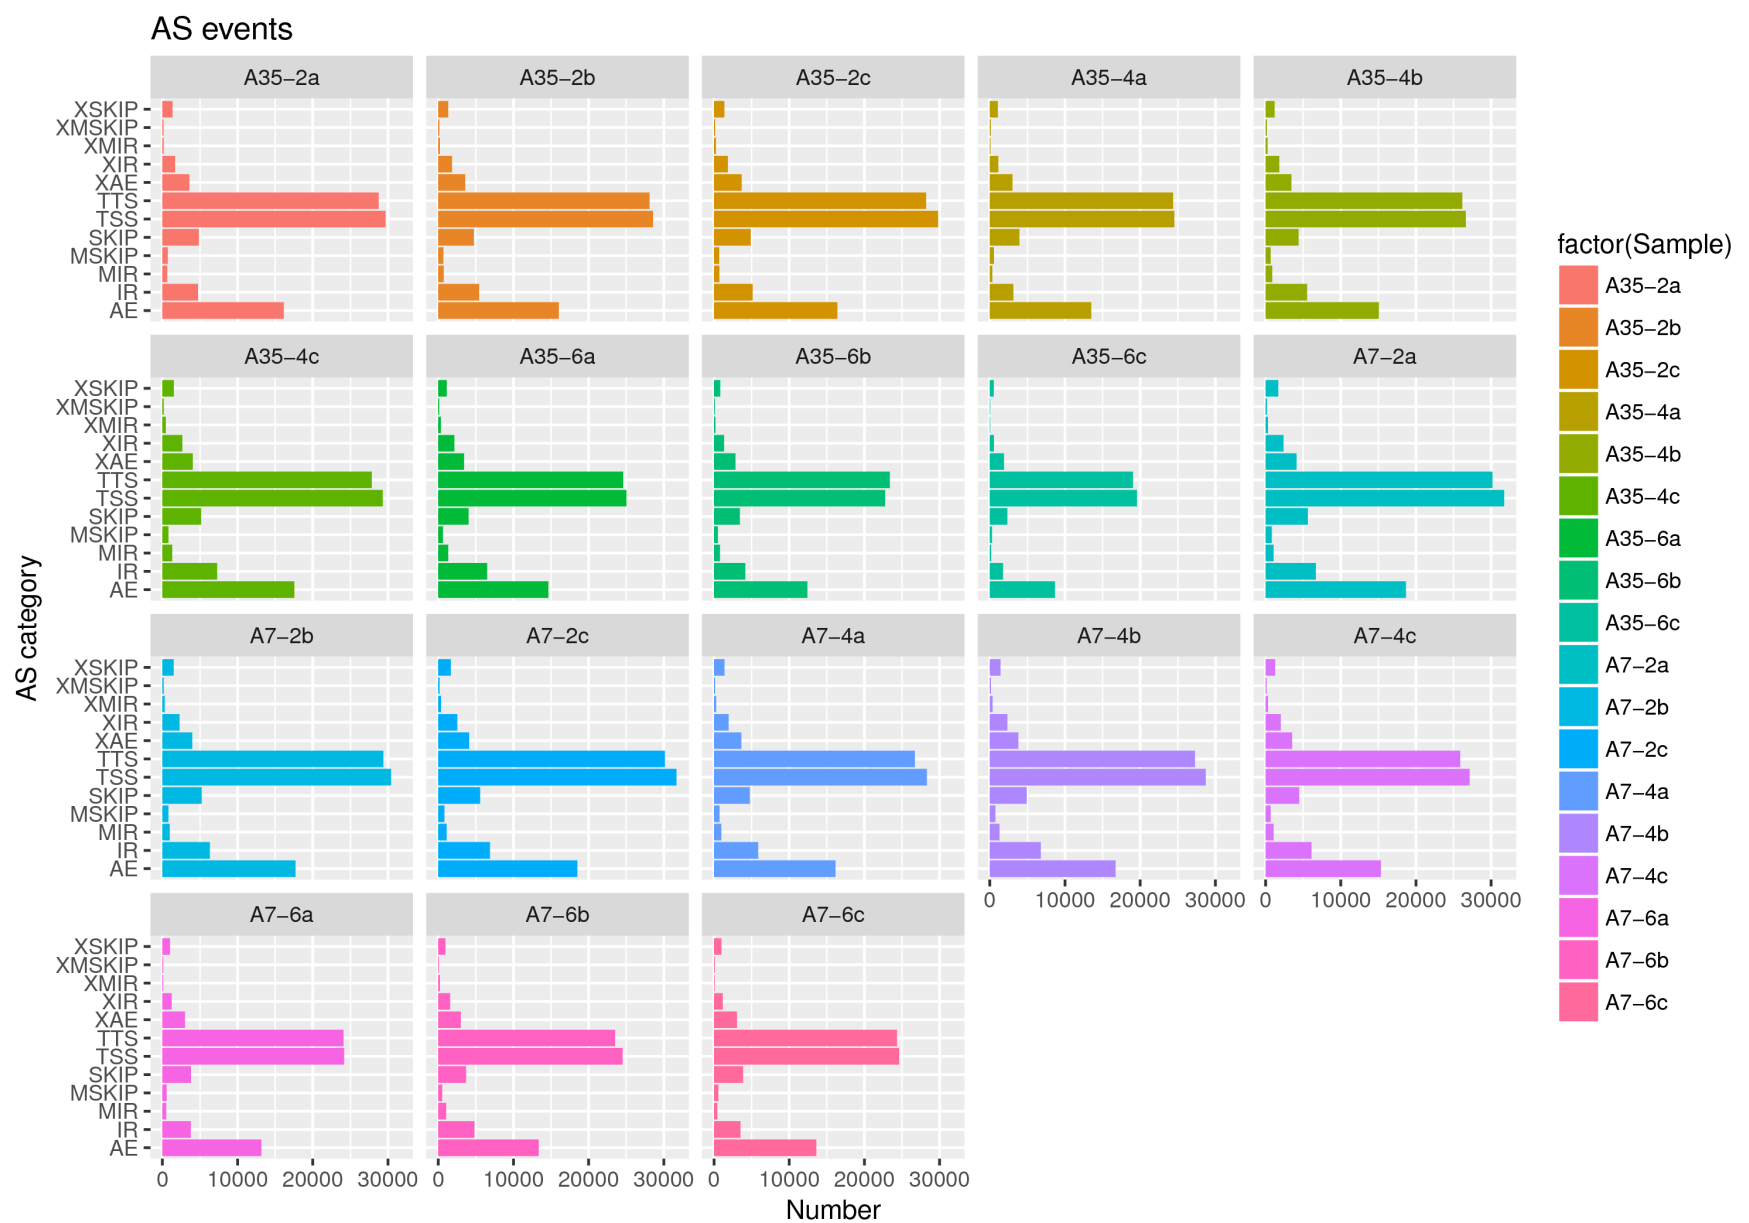

Figure 4.1.1 可变剪切种类与数目统计图;纵坐标为可变剪切事件的分类缩写;横坐标为该种事件下可变剪切的数量;不同样品用不同子图和颜色区分。

#### 4.2 可变剪切事件结构和表达量统计

Table 4.2.1 AS结构和表达量统计 (截取部分数据展示, 详见\*.anno.fpkm.xls)

| event_id | event_type | gene_id     | chrom | event_start | event_end | event_pattern | strand | fpkm         | ref_id          |
|----------|------------|-------------|-------|-------------|-----------|---------------|--------|--------------|-----------------|
| 1000002  | TTS        | XLOC_000001 | Chr01 | 63369       | 63419     | 63369         | +      | 0.5453940000 | Glyma.01G000200 |
| 1000007  | TSS        | XLOC_000004 | Chr01 | 116094      | 118482    | 118482        | +      | 1.4703410000 | Glyma.01G000600 |
| 1000009  | TTS        | XLOC_000004 | Chr01 | 127392      | 127845    | 127392        | +      | 1.4703410000 | Glyma.01G000600 |
| 1000011  | SKIP_OFF   | XLOC_000004 | Chr01 | 125587      | 125837    | 118482,127392 | +      | 1.4703410000 | Glyma.01G000600 |
| 1000014  | TSS        | XLOC_000005 | Chr01 | 143467      | 143547    | 143547        | +      | 1.4104680000 | Glyma.01G000900 |

- (1) event\_id: AS事件编号
- (2) event\_type: AS事件类型 (TSS, TTS, SKIP\_{ON,OFF}, XSKIP\_{ON,OFF}, MSKIP\_{ON,OFF}, XMSKIP\_{ON,OFF}, IR\_{ON,OFF}, XIR\_{ON,OFF}, AE, XAE)
- (3) gene\_id: cuffmerge组装结果中的基因编号
- (4) chrom: 染色体编号
- (5) event\_start: AS事件起始位置
- (6) event\_end: AS事件结束位置
- (7) event\_pattern: AS事件特征 (for TSS, TTS - inside boundary of alternative marginal exon; for \*SKIP\_ON, the coordinates of the skipped exon(s); for \*SKIP\_OFF, the coordinates of the enclosing introns; for \*IR\_ON, the end coordinates of the long, intron-containing exon; for \*IR\_OFF, the listing of coordinates of all the exons along the path containing the retained intron; for \*AE, the coordinates of the exon variant)
- (8) strand: 基因正负链信息
- (9) fpkm: 此AS类型该基因表达量
- (10) ref\_id: 此基因在参考注释文件中的编号

#### 5 新转录本预测

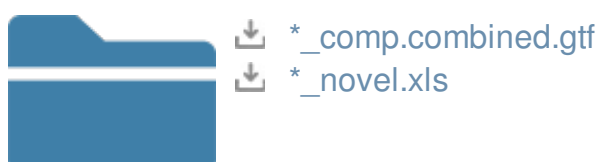

现有数据库中对转录本的注释可能还不全面，通过高通量测序我们能检测到新的转录本（Mortazavi, 2008）。将所有测序 reads 数据的基因组比对结果放到一起，用 StringTie(v1.0.4)（Nature Biotechnology 2015；Pertea M, et al.）进行组装，然后用 Cuffcompare 和已知的基因模型 (\*.gtf) 进行比较，可以：

- (1) 发现新的未知基因（相对于原有基因注释文件）；
- (2) 发现已知基因新的外显子区域；
- (3) 对已知基因的起始和终止位置进行优化。

新基因和新外显子区域预测结果为 GTF 格式的注释文件。GTF 格式的详细说明可参考: [GTF格式](#)。

**Table 5.1** 新转录本结构注释结果（截取部分数据展示，详见\*\_comp.combined.gtf）

| seqname | source    | feature | start  | end    | score | strand | frame | attributes                                                                                                                                                                           |
|---------|-----------|---------|--------|--------|-------|--------|-------|--------------------------------------------------------------------------------------------------------------------------------------------------------------------------------------|
| Chr01   | StringTie | exon    | 69685  | 69903  | .     | +      | .     | gene_id "XLOC_000001"; transcript_id "TCONS_00000001"; exon_number "1"; gene_name "Glyma.01G000300"; old "STRG.5.1"; nearest_ref "Glyma.01G000300.1"; class_code "c"; tss_id "TSS1"; |
| Chr01   | StringTie | exon    | 90211  | 90511  | .     | +      | .     | gene_id "XLOC_000002"; transcript_id "TCONS_00000002"; exon_number "1"; gene_name "Glyma.01G000500"; old "STRG.1.1"; nearest_ref "Glyma.01G000500.1"; class_code "e"; tss_id "TSS2"; |
| Chr01   | StringTie | exon    | 90719  | 92779  | .     | +      | .     | gene_id "XLOC_000002"; transcript_id "TCONS_00000003"; exon_number "1"; gene_name "Glyma.01G000500"; old "STRG.2.1"; nearest_ref "Glyma.01G000500.1"; class_code "e"; tss_id "TSS3"; |
| Chr01   | StringTie | exon    | 116094 | 118482 | .     | +      | .     | gene_id "XLOC_000003"; transcript_id "TCONS_00000004"; exon_number "1"; gene_name "Glyma.01G000600"; old "STRG.4.1"; nearest_ref "Glyma.01G000600.2"; class_code "="; tss_id "TSS4"; |
| Chr01   | StringTie | exon    | 127392 | 127845 | .     | +      | .     | gene_id "XLOC_000003"; transcript_id "TCONS_00000004"; exon_number "2"; gene_name "Glyma.01G000600"; old "STRG.4.1"; nearest_ref "Glyma.01G000600.2"; class_code "="; tss_id "TSS4"; |

- (1) seqname：染色体编号
- (2) source：来源标签，这里的 novelGene 指新基因
- (3) feature：区域类型，目前我们预测外显子区域
- (4) start：起始坐标
- (5) end：终止坐标
- (6) score：这个区域存在的可信值打分
- (7) strand：正负链信息
- (8) frame：如果是编码外显子，此处是 0-2 的数值；如果不是，就是“.”
- (9) attributes：属性，包括基因编号、转录本编号等信息

**Table 5.2** 已知基因结构优化（截取部分数据展示，详见\*\_novel.xls）

| Gene_id         | Chromosome | Strand | Original_span | Assembled_span |
|-----------------|------------|--------|---------------|----------------|
| Glyma.01G000300 | Chr01      | +      | 69600-69968   | 67770-69968    |
| Glyma.01G000500 | Chr01      | +      | 90922-91197   | 90277-91197    |
| Glyma.01G000600 | Chr01      | +      | 127392-127845 | 116094-127845  |
| Glyma.01G000900 | Chr01      | +      | 192861-193342 | 143467-193364  |
| Glyma.01G001000 | Chr01      | +      | 201524-201895 | 196256-201895  |

- (1) Gene\_id：基因命名编号
- (2) Chromosome：染色体编号
- (3) Strand：正负链信息
- (4) Original\_span：原注释文件中基因以及起始位置~终止位置
- (5) Assembled\_span：转录组拼接结果中基因起始位置~终止位置

## 6 SNV和InDel分析

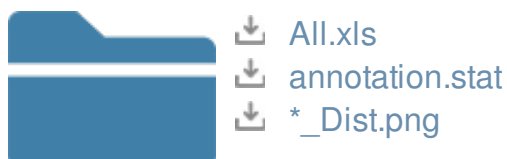

### 6.1 SNV和InDel分析

我们通过各样本与参考基因组的比对结果，利用 samtools (v0.1.18) 软件进行 mpileup 处理，从而获取各样本可能的 SNV 结果，然后用 annovar (v2013.02.11) 软件分别进行注释。基于数据库中注释好的基因信息，该软件能够将突变信息与基因信息关联，从而实现突变位点的注

释。突变引起氨基酸变化以及突变频率等信息请参考突变位点注释结果参见表6.1：

dbSNP数据库(version 135)是NCBI网站上专门用来收录已经报道过所有SNV和InDel信息（注：注释的结果需要在相同版本的数据库中查看）。

千人基因组(1000 genome)数据库(version 1000g2012apr)记录相关突变位点的突变频率信息。

**Table 6.1.1** SNV分析结果（截取部分数据展示，详见All.xls）

| Type  | Chr          | Start  | END    | Ref | Obs | Func       | Gene                            | ExonicFunc | AAChange | 1000genome | dbsnp   | A35-2a/(hom/het) | Qual | D |
|-------|--------------|--------|--------|-----|-----|------------|---------------------------------|------------|----------|------------|---------|------------------|------|---|
| SNV   | scaffold_635 | 4537   | 4537   | A   | G   | intergenic | NONE(dist=NONE),NONE(dist=NONE) |            |          | unknown    | unknown | -                | -    | - |
| SNV   | scaffold_635 | 4567   | 4567   | T   | G   | intergenic | NONE(dist=NONE),NONE(dist=NONE) |            |          | unknown    | unknown | -                | -    | - |
| SNV   | scaffold_635 | 6157   | 6157   | G   | T   | intergenic | NONE(dist=NONE),NONE(dist=NONE) |            |          | unknown    | unknown | -                | -    | - |
| INDEL | scaffold_21  | 31863  | 31863  | -   | CAT | exonic     | Glyma.U009200                   | unknown    | UNKNOWN  | unknown    | unknown | -                | -    | - |
| INDEL | scaffold_21  | 175888 | 175888 | -   | TTC | upstream   | Glyma.U010000                   |            |          | unknown    | unknown | -                | -    | - |

- (1) Type:位点突变分类(SNV/InDel)
- (2) Chr:染色体
- (3) Start:起始位置
- (4) End:终止位置
- (5) Ref:参考碱基
- (6) Obs:突变碱基
- (7) Func:功能区位置分类
- (8) Gene:功能区对应基因
- (9) ExonicFunc:外显子功能区突变类型
- (10) AAChange:碱基及氨基酸突变信息(NCBI序列号:碱基突变：氨基酸突变)
- (11) 1000genome:1000genome突变频率
- (12) dbsnp:SNP数据库注释ID
- (13) Sample\*:样本信息，分四列：
  - hom/het 突变类型(heterozygous或homozygous)
  - Qual ---质量
  - Depth 碱基深度
  - Freq 突变频率

AAChange示例说明：

**Table 6.1.2**

| SNV示例     | NM_177987:c.G729A:p.P243P |
|-----------|---------------------------|
| NM_177987 | 基因标示                      |
| c.        | 染色体                       |
| G         | 参考碱基                      |
| 729       | 基因上的位置                    |
| A         | 突变碱基                      |
| p.        | 肽链                        |
| P         | 替换前的参考氨基酸                 |
| 243       | 氨基酸在肽链上的位置                |
| P         | 突变后氨基酸变化                  |

**Table 6.1.3**

| InDel示例    | NM_014696:c.720_721insATGAGGGAG:p.E240delinsEMRE |
|------------|--------------------------------------------------|
| NM_014696  | 基因标示                                             |
| c.         | 染色体                                              |
| 720_721    | 基因位置720与721之间插入片段                                |
| ins insert | 插入                                               |
| p.         | 肽链                                               |
| E240       | 肽链240位的氨基酸E后插入MRE这三个氨基酸                          |
| delins     | 插入                                               |
| EMRE       | 插入后氨基酸变化情况                                       |

## 6.2 SNV/InDel在基因组功能区分布

通过数据库中基因注释信息，统计SNV/InDel相对于基因的发生位置即突变在基因组上的位置信息，并统计分布状况。

**Table 6.2.1** SNV/InDel在基因组上的分布

| Sample              | A35-2a | A35-2b | A35-2c | A35-4a | A35-4b | A35-4c | A35-6a | A35-6b | A35-6c | A7-2a | A7-2b | A7-2c | A7-4a | A7-4b | A7-4c | A7-6a | A7-6b | A7-6c |
|---------------------|--------|--------|--------|--------|--------|--------|--------|--------|--------|-------|-------|-------|-------|-------|-------|-------|-------|-------|
| exonic              | 37486  | 37259  | 38495  | 28336  | 34389  | 38271  | 33403  | 28556  | 21816  | 53684 | 50977 | 53920 | 46668 | 47340 | 44083 | 39882 | 39041 | 38159 |
| intergenic          | 3392   | 4013   | 4649   | 2143   | 3007   | 4510   | 3493   | 2137   | 1351   | 7563  | 7114  | 8356  | 4566  | 4673  | 4322  | 2672  | 3323  | 2609  |
| intronic            | 15033  | 16528  | 17529  | 8089   | 17001  | 23911  | 19423  | 11097  | 4290   | 29671 | 26720 | 31895 | 24005 | 26290 | 24029 | 10936 | 17252 | 11027 |
| splicing            | 342    | 372    | 448    | 233    | 263    | 387    | 353    | 156    | 128    | 422   | 420   | 427   | 307   | 314   | 271   | 176   | 231   | 228   |
| exonic;splicing     | 35     | 45     | 43     | 30     | 34     | 36     | 38     | 29     | 21     | 40    | 37    | 41    | 31    | 33    | 34    | 31    | 26    | 24    |
| ncRNA_exonic        | 0      | 0      | 0      | 0      | 0      | 0      | 0      | 0      | 0      | 0     | 0     | 0     | 0     | 0     | 0     | 0     | 0     | 0     |
| ncRNA_intronic      | 0      | 0      | 0      | 0      | 0      | 0      | 0      | 0      | 0      | 0     | 0     | 0     | 0     | 0     | 0     | 0     | 0     | 0     |
| ncRNA_splicing      | 0      | 0      | 0      | 0      | 0      | 0      | 0      | 0      | 0      | 0     | 0     | 0     | 0     | 0     | 0     | 0     | 0     | 0     |
| ncRNA_UTR3          | 0      | 0      | 0      | 0      | 0      | 0      | 0      | 0      | 0      | 0     | 0     | 0     | 0     | 0     | 0     | 0     | 0     | 0     |
| ncRNA_UTR5          | 0      | 0      | 0      | 0      | 0      | 0      | 0      | 0      | 0      | 0     | 0     | 0     | 0     | 0     | 0     | 0     | 0     | 0     |
| upstream            | 938    | 1043   | 1156   | 543    | 718    | 1022   | 819    | 516    | 357    | 1626  | 1440  | 1838  | 1033  | 1130  | 1017  | 624   | 757   | 653   |
| downstream          | 1171   | 1492   | 1413   | 665    | 1108   | 1476   | 1181   | 874    | 429    | 2410  | 2254  | 2566  | 1391  | 1599  | 1338  | 835   | 1036  | 854   |
| upstream;downstream | 153    | 219    | 229    | 100    | 169    | 211    | 188    | 102    | 57     | 301   | 300   | 325   | 196   | 233   | 184   | 116   | 144   | 111   |
| UTR3                | 0      | 0      | 0      | 0      | 0      | 0      | 0      | 0      | 0      | 0     | 0     | 0     | 0     | 0     | 0     | 0     | 0     | 0     |
| UTR5                | 0      | 0      | 0      | 0      | 0      | 0      | 0      | 0      | 0      | 0     | 0     | 0     | 0     | 0     | 0     | 0     | 0     | 0     |
| UTR5;UTR3           | 0      | 0      | 0      | 0      | 0      | 0      | 0      | 0      | 0      | 0     | 0     | 0     | 0     | 0     | 0     | 0     | 0     | 0     |
| Total               | 58550  | 60971  | 63962  | 40139  | 56689  | 69824  | 58898  | 43467  | 28449  | 95717 | 89262 | 99368 | 78197 | 81612 | 75278 | 55272 | 61810 | 53665 |

- (1) Sample: 测序样品名称
- (2) exonic: 外显子区
- (3) intergenic: 基因间区
- (4) intronic: 内含子区
- (5) splicing: 剪切位点
- (6) exonic;splicing: 外显子区 ; 剪切位点
- (7) ncRNA\_exonic: ncRNA外显子区
- (8) ncRNA\_intronic: ncRNA内含子区
- (9) ncRNA\_splicing: ncRNA剪切位点
- (10) ncRNA\_UTR3: ncRNA的3' UTR区
- (11) ncRNA\_UTR5: ncRNA的5' UTR区
- (12) upstream: 基因上游区
- (13) downstream: 基因下游区
- (14) upstream;downstream: 基因上游区 ; 其他基因下游区
- (15) UTR3: 基因3'UTR区
- (16) UTR5: 基因5' UTR区
- (17) UTR5;UTR3:基因5' UTR区 ; 其他基因3' UTR区
- (18) Total: 突变位点总数

通过饼图，可直观观测到各样本SNV/InDel在基因组不同功能区域分布状况，如下图所示：



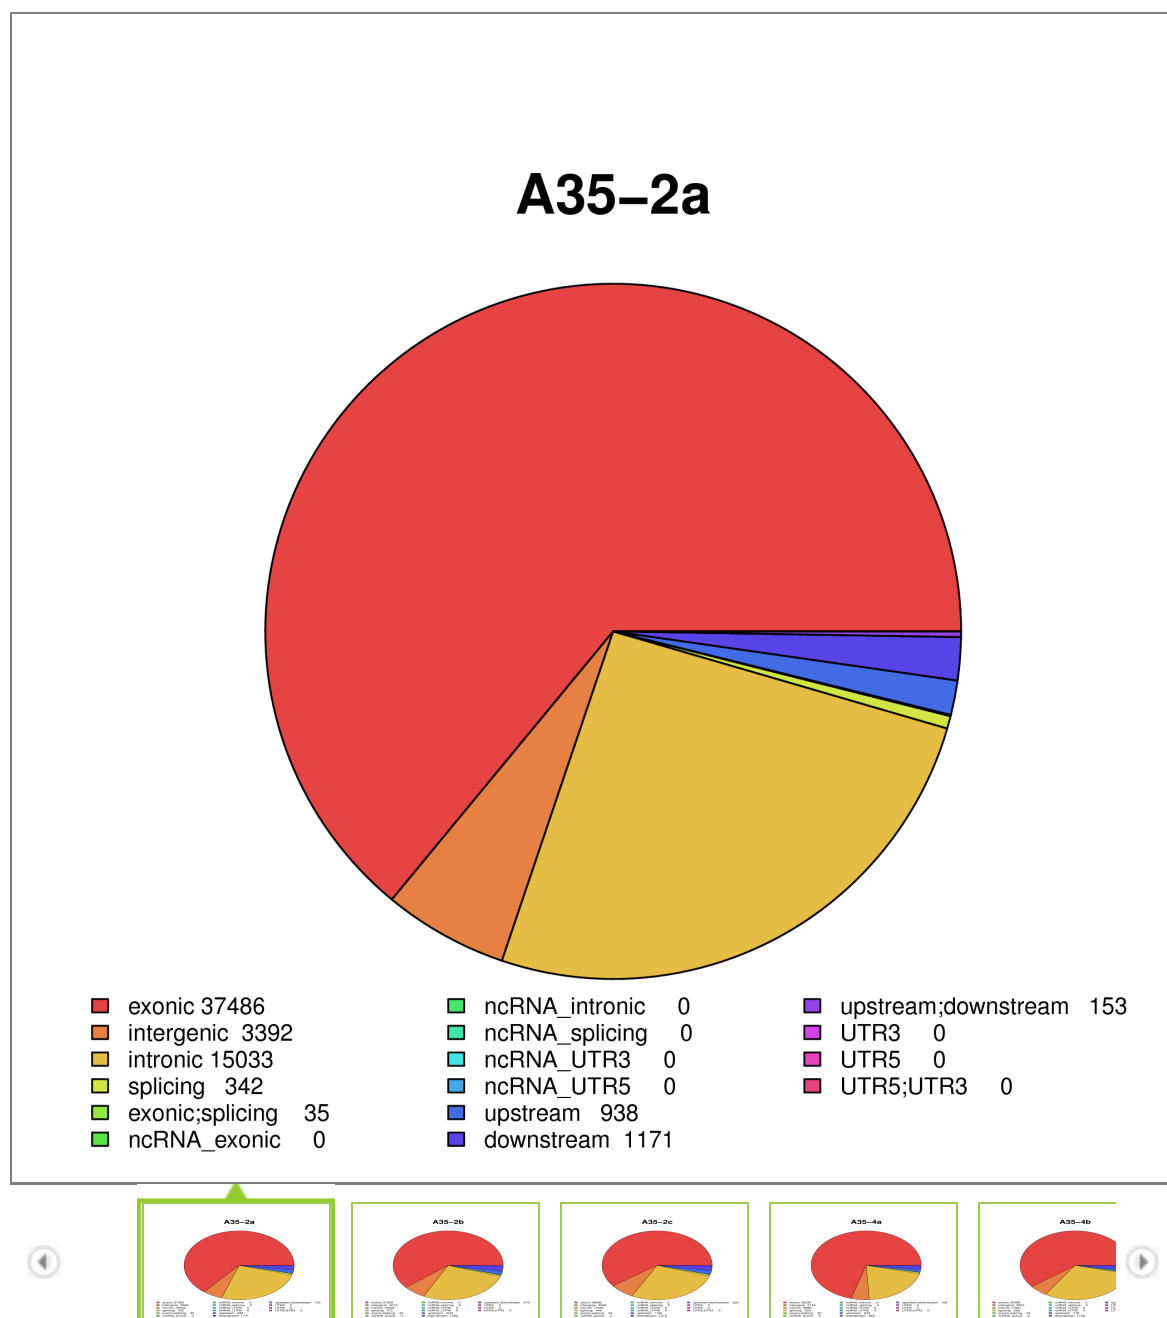

Figure 6.2.1 SNV/InDel在基因组上的分布

## 7 基因表达分析

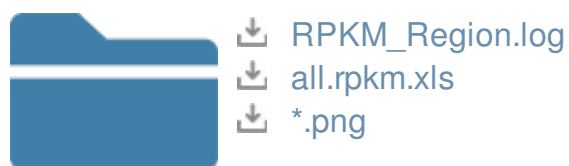

一个基因表达水平的直接体现就是其在基因上的丰度情况，基因丰度程度越高，则基因表达水平越高。基因表达计算使用Htseq软件(V 0.6.1)，该软件使用RPKM (Reads Per Kilo bases per Million reads) (Mortazavi, 2008) 方法计算基因表达量。

其公式为：

$$RPKM = \frac{\text{total exon reads}}{\text{mapped reads (millions)} * \text{exon length (KB)}}$$

Figure 7.1

其中，total exon reads / mapped reads (millions) 可以视为所有read 数中有百分之多少是map 到这个基因，然后再除以基因长度，就可以某基因得到单位长度有百分之多少的total mapped read 有表达。采用RPKM方法标准化不仅对测序深度作了归一化，而且对基因长度也作了归一化，使得不同长度的基因在不同测序深度下得到的基因表达水平估计值具有了可比性。

结果文件分别统计了不同表达水平下基因的数量以及单个基因的表达水平。一般情况下，RPKM 数值0.1 或者1 作为判断基因是否表达的阈值，不同的文献所采用的阈值不同。

Table 7.1 不同表达水平区间的基因数量统计表

| Sample | 0-0.1       | 0.1-1         | 1-3          | 3-15          | 15-60        | >60         |
|--------|-------------|---------------|--------------|---------------|--------------|-------------|
| A35-2a | 2458(5.63%) | 8815(20.20%)  | 7959(18.24%) | 16539(37.90%) | 5996(13.74%) | 1870(4.29%) |
| A35-2b | 2224(5.15%) | 8801(20.40%)  | 7883(18.27%) | 16357(37.91%) | 5948(13.78%) | 1939(4.49%) |
| A35-2c | 2363(5.54%) | 8675(20.33%)  | 7842(18.38%) | 16053(37.62%) | 5786(13.56%) | 1949(4.57%) |
| A35-4a | 2602(6.64%) | 9652(24.64%)  | 8605(21.97%) | 13057(33.34%) | 3927(10.03%) | 1322(3.38%) |
| A35-4b | 2524(6.18%) | 8938(21.88%)  | 8389(20.53%) | 15153(37.09%) | 4422(10.82%) | 1429(3.50%) |
| A35-4c | 3388(8.17%) | 8995(21.68%)  | 8007(19.30%) | 15332(36.95%) | 4493(10.83%) | 1275(3.07%) |
| A35-6a | 3105(7.94%) | 9828(25.13%)  | 8644(22.10%) | 13344(34.12%) | 3278(8.38%)  | 908(2.32%)  |
| A35-6b | 2731(7.07%) | 10074(26.08%) | 8873(22.97%) | 12849(33.27%) | 3249(8.41%)  | 845(2.19%)  |
| A35-6c | 3316(9.25%) | 11408(31.81%) | 8779(24.48%) | 9142(25.49%)  | 2439(6.80%)  | 781(2.18%)  |
| A7-2a  | 3395(7.68%) | 8605(19.46%)  | 6951(15.72%) | 16796(37.98%) | 6649(15.04%) | 1823(4.12%) |
| A7-2b  | 2972(6.77%) | 8709(19.84%)  | 7119(16.22%) | 16678(37.99%) | 6510(14.83%) | 1908(4.35%) |
| A7-2c  | 3428(7.77%) | 8723(19.77%)  | 6968(15.79%) | 16599(37.61%) | 6539(14.82%) | 1873(4.24%) |
| A7-4a  | 3184(7.75%) | 9089(22.13%)  | 8305(20.22%) | 15126(36.83%) | 4118(10.03%) | 1248(3.04%) |
| A7-4b  | 2811(6.79%) | 8618(20.83%)  | 7671(18.54%) | 15905(38.44%) | 4955(11.98%) | 1417(3.42%) |
| A7-4c  | 2796(6.93%) | 9246(22.93%)  | 8307(20.60%) | 14939(37.05%) | 3899(9.67%)  | 1134(2.81%) |
| A7-6a  | 3121(7.96%) | 10421(26.58%) | 9063(23.12%) | 12669(32.32%) | 3084(7.87%)  | 845(2.16%)  |
| A7-6b  | 3023(7.84%) | 10093(26.16%) | 9033(23.41%) | 12762(33.08%) | 2918(7.56%)  | 754(1.95%)  |
| A7-6c  | 3361(8.62%) | 10253(26.31%) | 8948(22.96%) | 12618(32.38%) | 3021(7.75%)  | 770(1.98%)  |

Table 7.2 基因表达水平统计表 (截取部分数据展示, 详见all.rpkm.xls)

| gene_id         | Exonic.gene.sizes | A35- 2a | A35- 2a_RPKM | A35- 2b | A35- 2b_RPKM | A35- 2c | A35- 2c_RPKM | A35- 4a | A35- 4a_RPKM | A35- 4b | A35- 4b_RPKM | A35- 4c | A35- 4c_RPKM | A35- 6a | A35- 6a_RPKM | A35- 6b | A35- 6b_F |
|-----------------|-------------------|---------|--------------|---------|--------------|---------|--------------|---------|--------------|---------|--------------|---------|--------------|---------|--------------|---------|-----------|
| Glyma.01G000100 | 718               | 97      | 8.49         | 76      | 7.49         | 39      | 3.22         | 78      | 7.25         | 139     | 13.09        | 266     | 15.04        | 153     | 10.81        | 82      | 8.76      |
| Glyma.01G000200 | 1046              | 50      | 3.00         | 52      | 3.52         | 82      | 4.65         | 127     | 8.10         | 107     | 6.92         | 256     | 9.94         | 120     | 5.82         | 31      | 2.27      |
| Glyma.01G000300 | 387               | 0       | 0.00         | 7       | 1.28         | 4       | 0.61         | 1       | 0.17         | 1       | 0.17         | 7       | 0.73         | 2       | 0.26         | 0       | 0.00      |
| Glyma.01G000400 | 2459              | 244     | 6.24         | 179     | 5.15         | 220     | 5.31         | 122     | 3.31         | 200     | 5.50         | 343     | 5.66         | 178     | 3.67         | 79      | 2.46      |
| Glyma.01G000500 | 357               | 6       | 1.06         | 1       | 0.20         | 10      | 1.66         | 0       | 0.00         | 5       | 0.95         | 16      | 1.82         | 2       | 0.28         | 2       | 0.43      |

## 8 RNA-seq整体质量评估

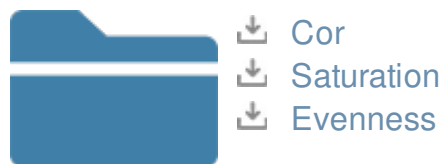

### 8.1 表达水平的饱和曲线检查

定量饱和曲线检查反映了基因表达水平定量对数据量的要求。表达量越高的基因，就越容易被准确定量；反之，表达量低的基因，需要较大的测序数据量才能被准确定量。软件RSeQC通过对总的比对reads重采样 (jackknifing)，评估在当前测序深度下的RPKM,使用相对错误率Percent relative error来测量评估的RPKM的准确性。

$$\text{Percent Relative Error} = \frac{|RPKM_{obs} - RPKM_{real}|}{RPKM_{real}} \times 100$$

Figure 8.1.1

其中， $RPKM_{obs}$ 是指每一个百分比抽样下的当前转录本的RPKM值， $RPKM_{real}$ 是指总的的数据量下当前转录本的RPKM值。

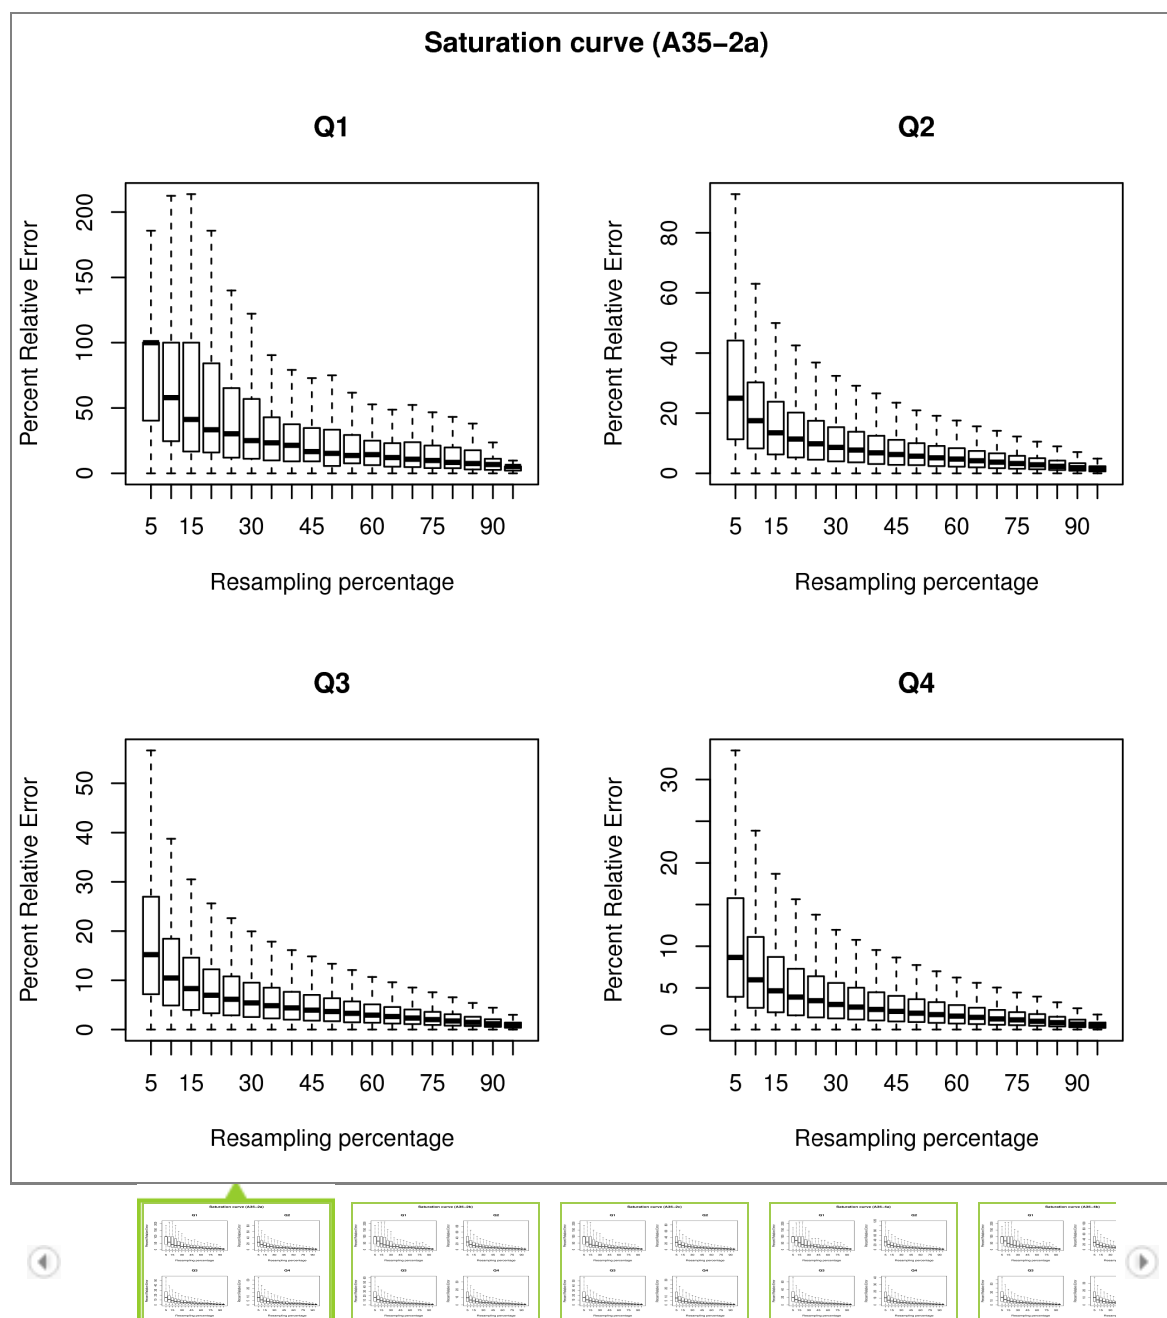

**Figure 8.1.2** 定量饱和曲线检查分布图，横坐标代表定位到基因组上的reads数占总reads数的百分比，纵坐标代表相对误差百分比。Q1为转录本表达水平低于25%的饱和度箱图；Q2为转录本表达水平在25%~50%的饱和度箱图；Q3为转录本表达水平在50%~75%的饱和度箱图；Q4为转录本表达水平高于75%的饱和度箱图。

## 8.2 RNA-Seq相关性检查

生物学重复主要有两个用途：一个是证明所涉及的生物学实验操作是可以重复的且变异不大，另一个为后续的差异基因分析所需要的。样品间基因表达水平相关性是检验实验可靠性和样本选择是否合理性的重要指标。Pearson correlation Coefficient是一个相关系数，它指出了两个变量之间相关的亲密程度和方向。这个数值的绝对值越大越说明两个变量的关系越亲密，它的绝对值为0-1之间。具体的项目操作中，我们要求R2至少要大于0.8，否则需要对样品做出合适的解释，或者重新进行实验。此部分，我们同时计算了spearman 秩相关系数和kendall-tau等级相关系数作为参考。

如果没有生物学重复，则不进行该项分析，即结果文件夹Cor为空。

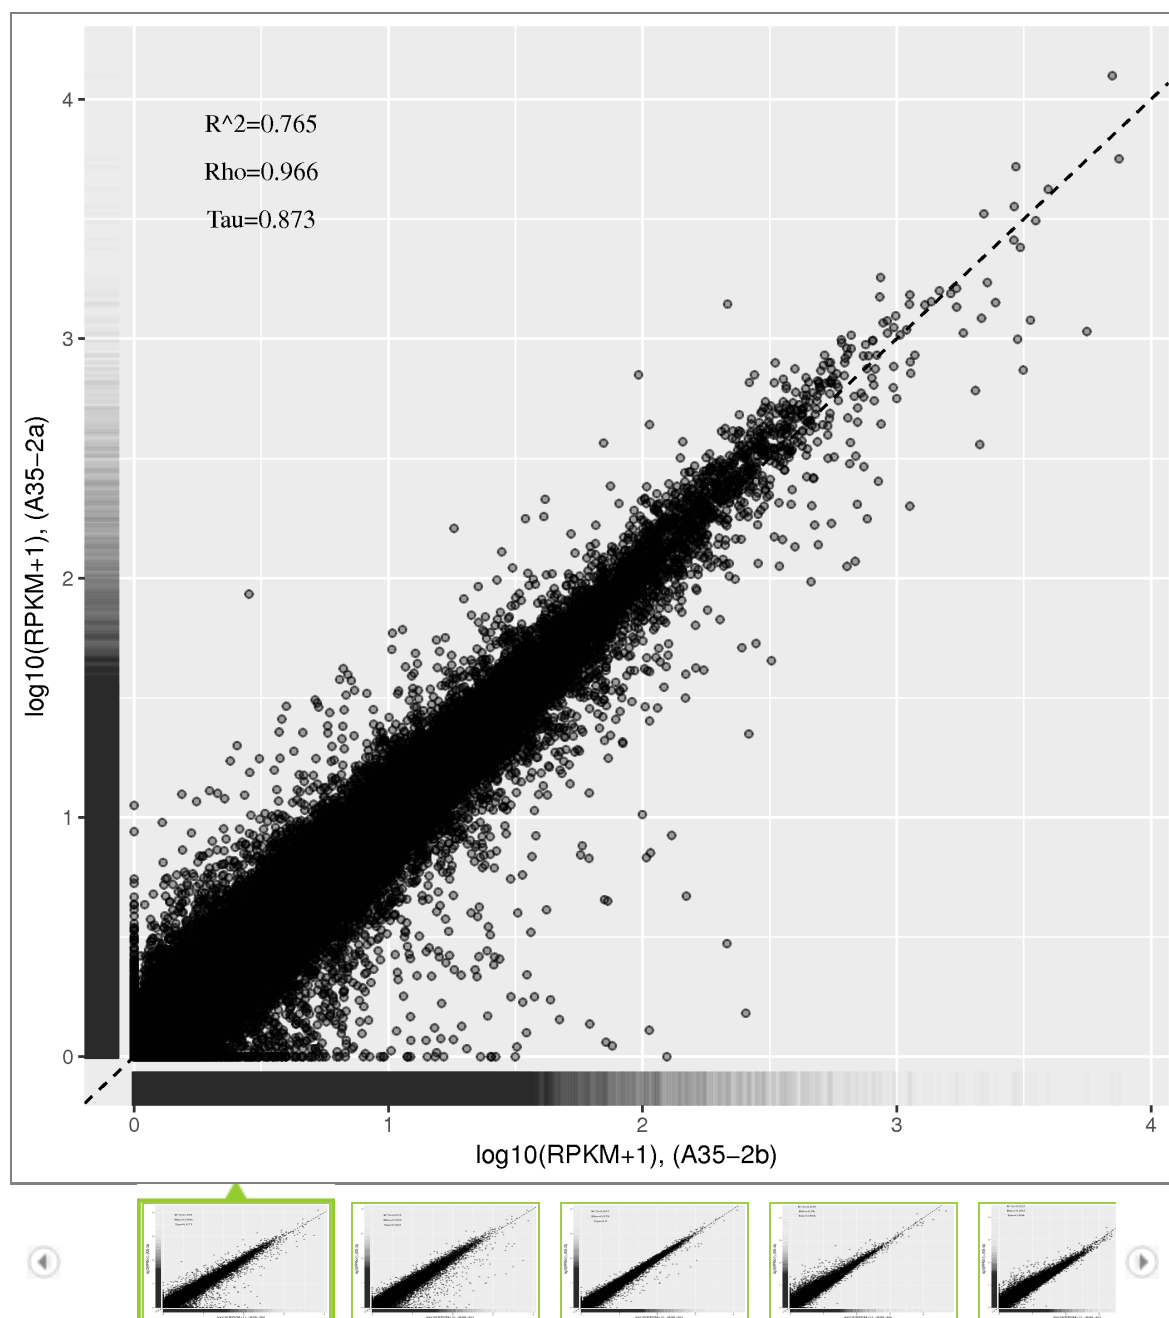

Figure 8.2.1 RNA-Seq相关性检查

$R^2$ :pearson 相关系数的平方; rho:spearman 相关系数; tau:kendall-tau 相关系数。

### 8.3 均一性分布检查

理想条件下，对于RNA-seq 技术来说，测序reads之间为独立抽样并且reads 在所有表达的转录本上的分布应该呈现均一化分布。然而很多研究表明，很多偏好型的因素都会影响这种均一化的分布(Dohm et al., 2008)。例如，在RNA-seq 建库过程中，片段破碎和RNA 反转录的顺序不一样会导致RNA-seq 最终的数据呈现严重的3'偏好性。其他因素还包括转录区域的GC含量不同、随机引物等等，并且生物体内从5'或者3'的降解过程同样会导致不均一性分布。

均一性分布的曲线算法是：

- (1) 把每个转录本从5'到3'的方向平均等分为100份
- (2) 计算每个等份中的碱基平均测序深度，并用最大值来进行归一化处理

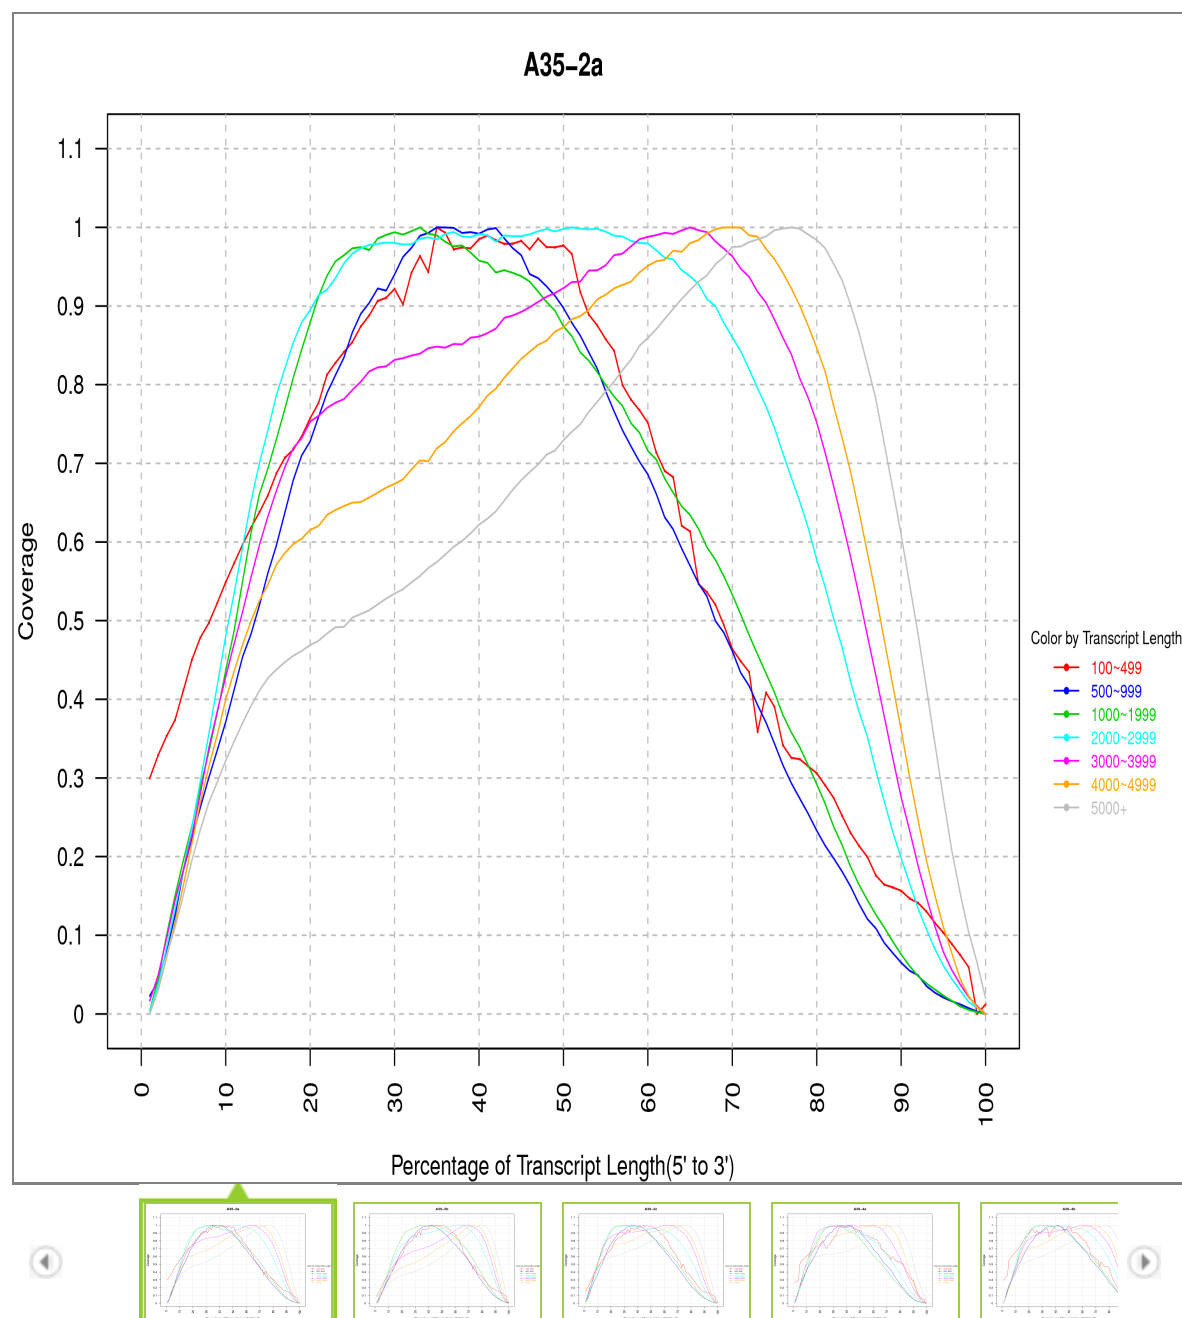

**Figure 8.3.1** 不同长度的转录本的reads 密度分布图，横坐标为转录本长度的百分比；纵坐标是平均测序深度；不同的颜色表示不同长度范围的转录本

## 9 PCA分析

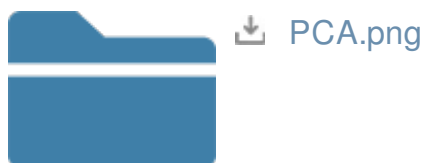

PCA(Principal Component Analysis),即主成分分析可以降低数据的复杂性，深入挖掘样品之间关系和变异大小。基本原理是利用数学的方法，将原来变量重新组合成一组新的互相无关的几个综合变量（即主成分），对所有因素按重要性排序，通常靠后的微小因素被忽略，从而起到简化数据的作用。通常以两个或三个主成分为坐标轴画成图，就可以看出各个样本之间的距离关系，包括成簇成组的视觉效果。下图展示样本间的聚类关系：

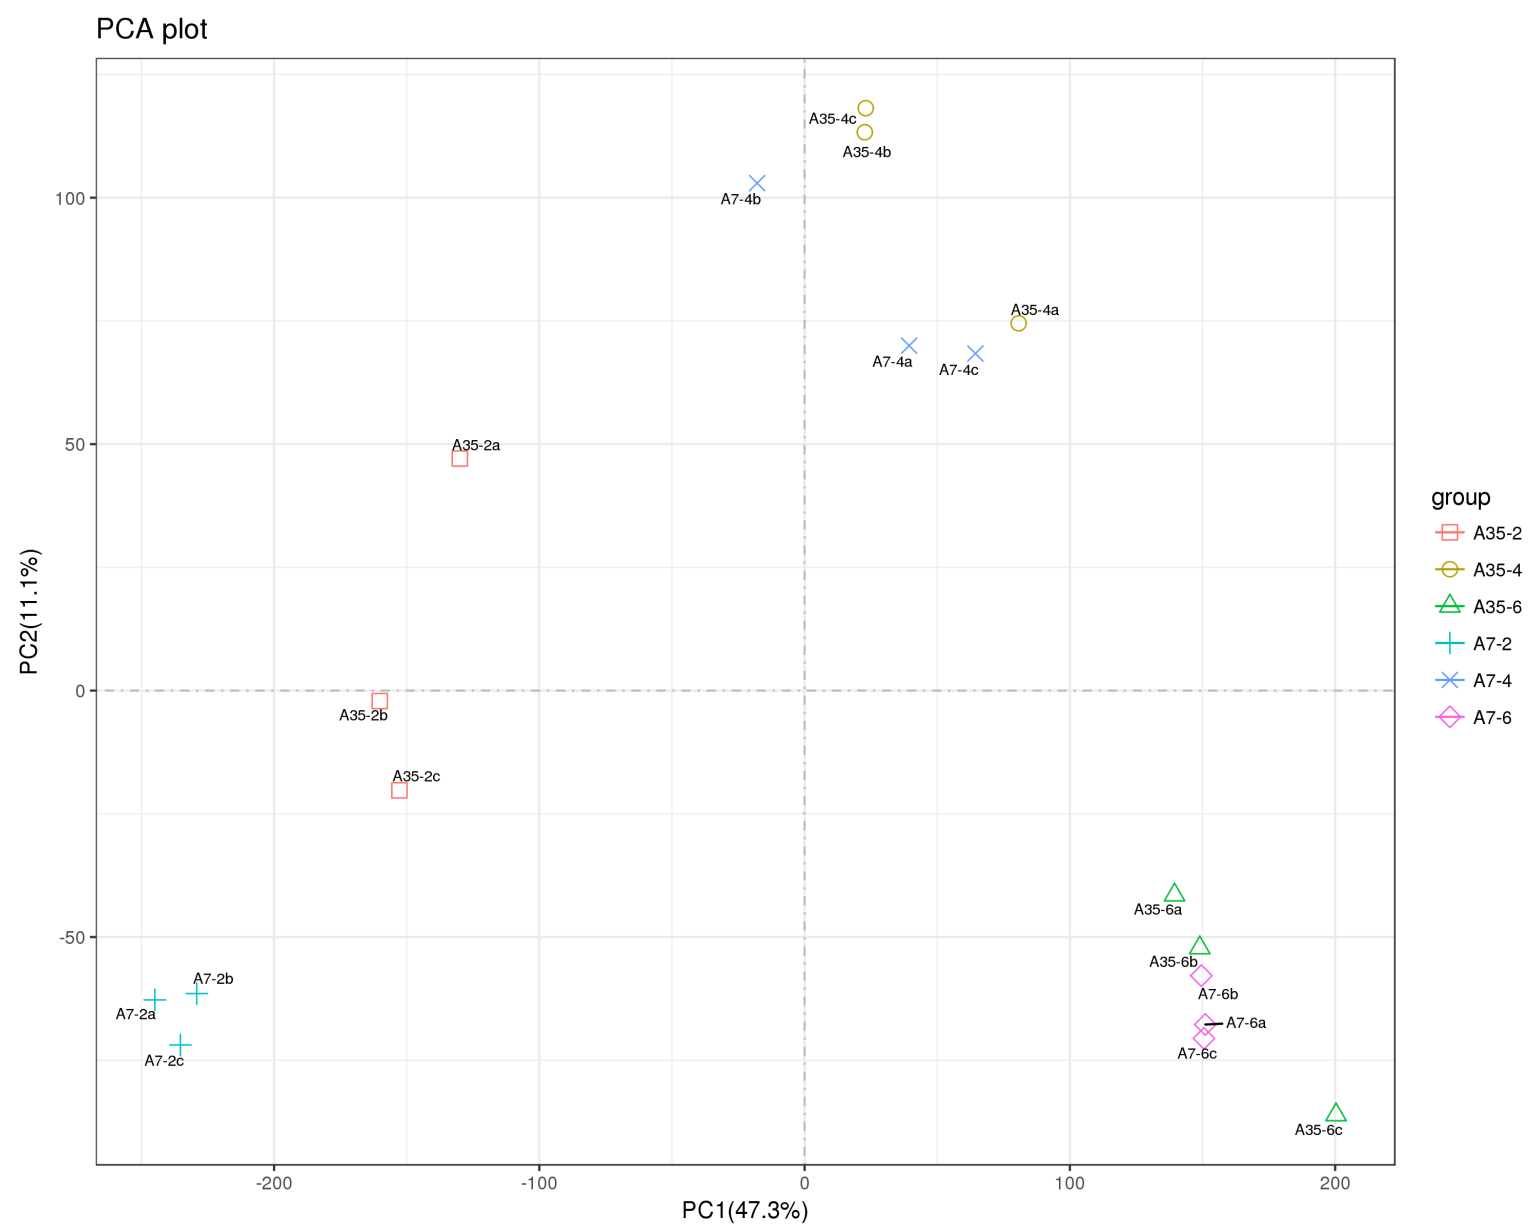

Figure 9.1 主成分分析图，每个圆点的位置代表样品在各主成分上的取值

## 10 基因差异表达分析

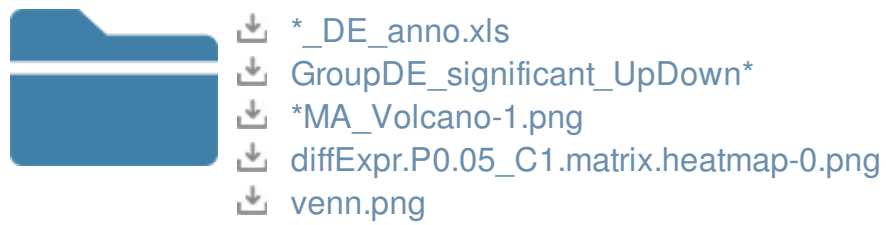

### 10.1 基因表达水平对比

通过所有基因的 RPKM 的分布图以及盒形图对不同实验条件下的基因表达水平进行比较。

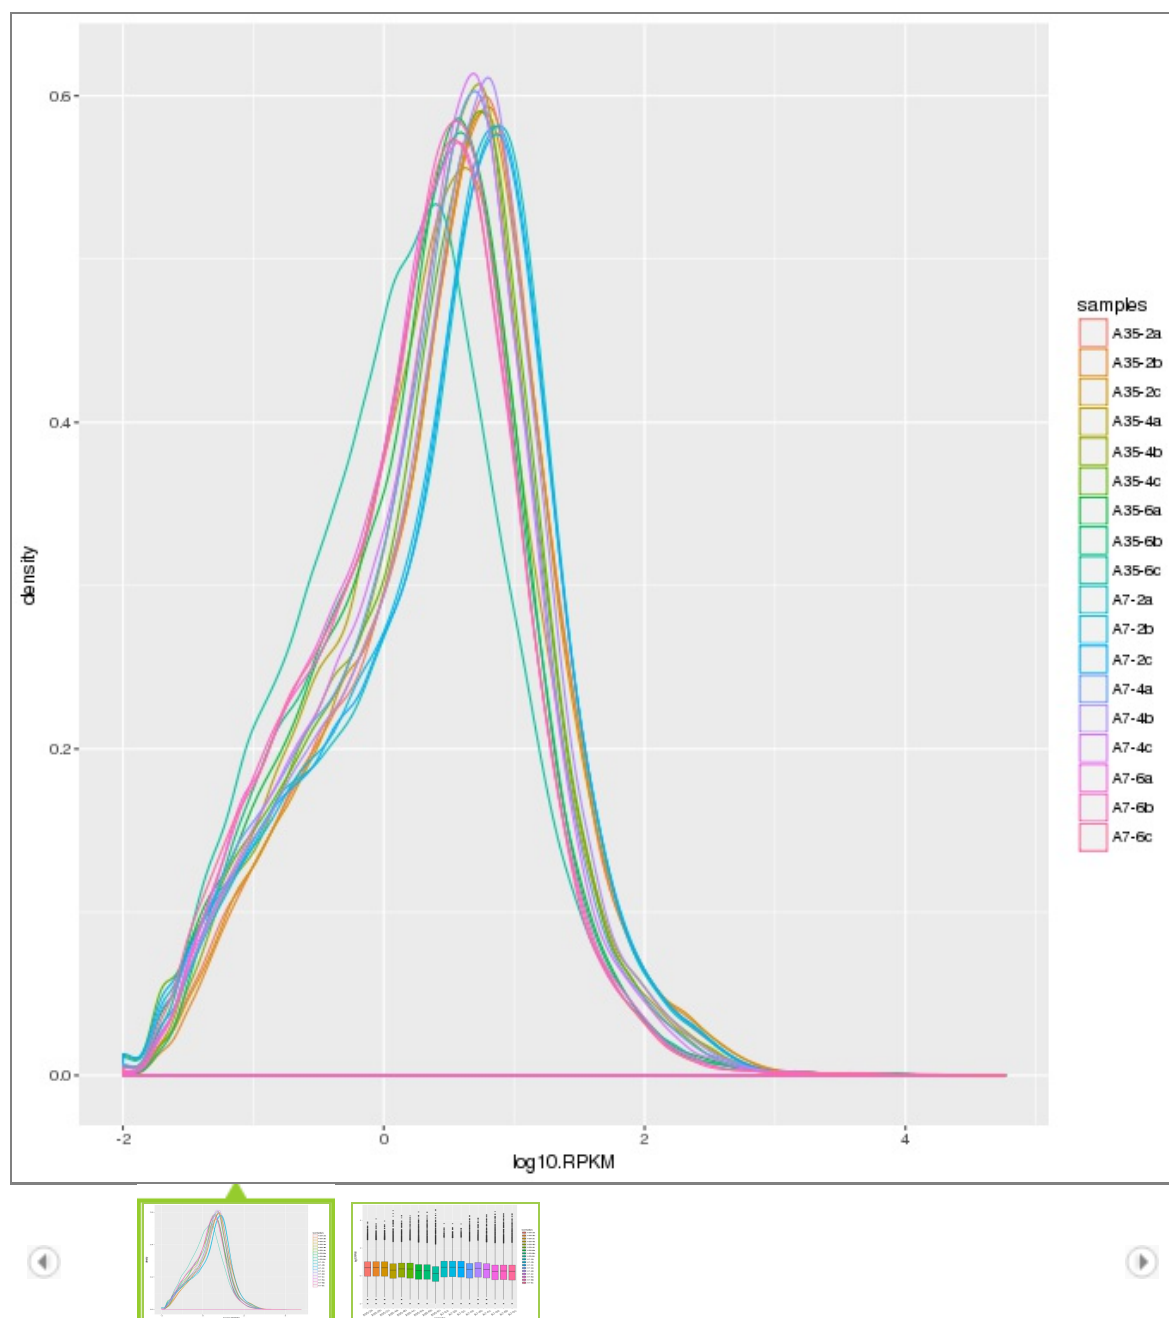

**Figure 10.1.1** 不同实验条件下基因表达水平对比图 图一：RPKM分布图，横坐标为 $\log_{10}(\text{RPKM})$ ，纵坐标为基因的密度。图二：RPKM盒形图，横坐标为样品名称，纵坐标为 $\log_{10}(\text{RPKM})$ ，每个区域的盒形图对五个统计量(至上而下分别为最大值，上四分位数，中值，下四分位数和最小值)

## 10.2 差异表达基因列表

基因差异表达的输入数据为基因表达水平分析中得到的read count数据。

对于有生物学重复的样品，基因差异分析使用Bioconductor软件包的DESeq2 (V1.6.3) 进行分析,该分析方法基于的模型是负二项分布，第  $i$  个基因在第  $j$  个样本中的 read count 值为 $K_{ij}$ ，则有

$$K_{ij} \sim \text{NB}(\mu_{ij}, \alpha_{ij})$$

$$\mu_{ij} = s_j q_{ij}$$

$$\log_2 = x_j \beta_i$$

特殊情况下，基因差异分析使用Bioconductor软件包的edgeR (V3.4.6) 进行分析。

本次分析使用的软件是DESeq2。

**Table 10.2.1** 差异基因列表 (截取部分数据展示，详见\*\_DE.xls)

| gene_id         | baseMean         | log2FoldChange   | lfcSE             | stat             | pvalue                | padj                  | GeneSymbol      |
|-----------------|------------------|------------------|-------------------|------------------|-----------------------|-----------------------|-----------------|
| Glyma.11G065800 | 4774.04026438279 | 9.15450057068815 | 0.240392862747382 | 38.0814158376582 | 0                     | 0                     | Glyma.11G065800 |
| Glyma.11G252800 | 11573.2117931042 | 11.056708962063  | 0.270194420913998 | 40.9213074224886 | 0                     | 0                     | Glyma.11G252800 |
| Glyma.U020300   | 10198.212047409  | 9.25872585530302 | 0.246008973205302 | 37.63572415538   | 0                     | 0                     | Glyma.U020300   |
| Glyma.08G350800 | 8591.11038630432 | 5.32045961890756 | 0.14189616808124  | 37.4954425538921 | 1.09285837160669e-307 | 1.16821095632897e-303 | Glyma.08G350800 |
| Glyma.20G219900 | 1556.67124947904 | 4.21581619802145 | 0.115300650084312 | 36.5636810801906 | 1.08097855810635e-292 | 9.24409623750223e-289 | Glyma.20G219900 |

- (1) Id:基因ID
- (2) baseMean:片段数目的平均值归一化，两种条件下的平均值
- (3) log2FoldChange:对差异变化值以2为底取log
- (4) lfcSE:对log2FoldChange进行标准误差估算
- (5) stat:Wald检验
- (6) pval:统计差异显著性值
- (7) padj:FDR校正P值
- (8) GeneSymbol:基因名称
- (9) KO:KEGG ID
- (10) GO:Gene Ontology ID

### 10.3 差异表达基因筛选

对检测的结果按照差异显著性标准（差异基因表达变化2倍以上且FDR≤0.05）进行筛选，统计基因显著性差异表达上下调情况。

**Table 10.3.1** 不同条件样品基因显著性差异表达上下调数量

| Sample-VS-Sample | UPs  | Down |
|------------------|------|------|
| A7-2-VS-A7-4     | 5401 | 7237 |
| A7-2-VS-A7-6     | 7299 | 9736 |
| A7-4-VS-A7-6     | 3399 | 4196 |
| A35-2-VS-A35-4   | 3230 | 6134 |
| A35-2-VS-A35-6   | 5403 | 8828 |
| A35-4-VS-A35-6   | 3341 | 4034 |
| A35-2-VS-A7-2    | 1501 | 3317 |
| A35-4-VS-A7-4    | 662  | 709  |
| A35-6-VS-A7-6    | 822  | 693  |
| A35-VS-A7        | 587  | 725  |



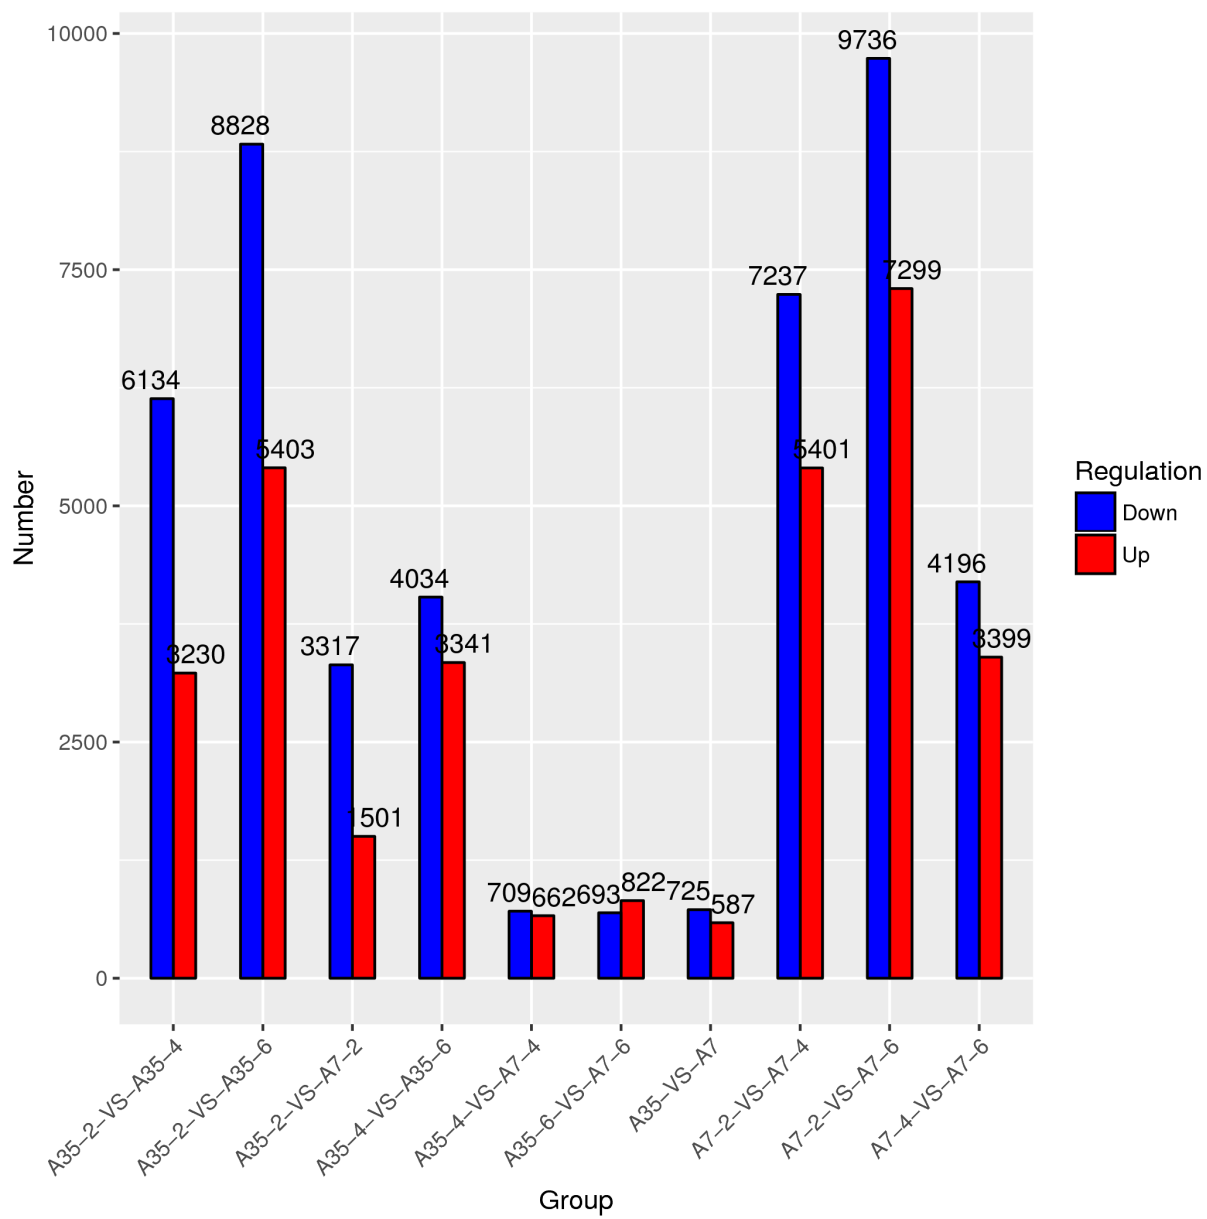

Figure 10.3.1 样品差异比较基因表达的上下调情况

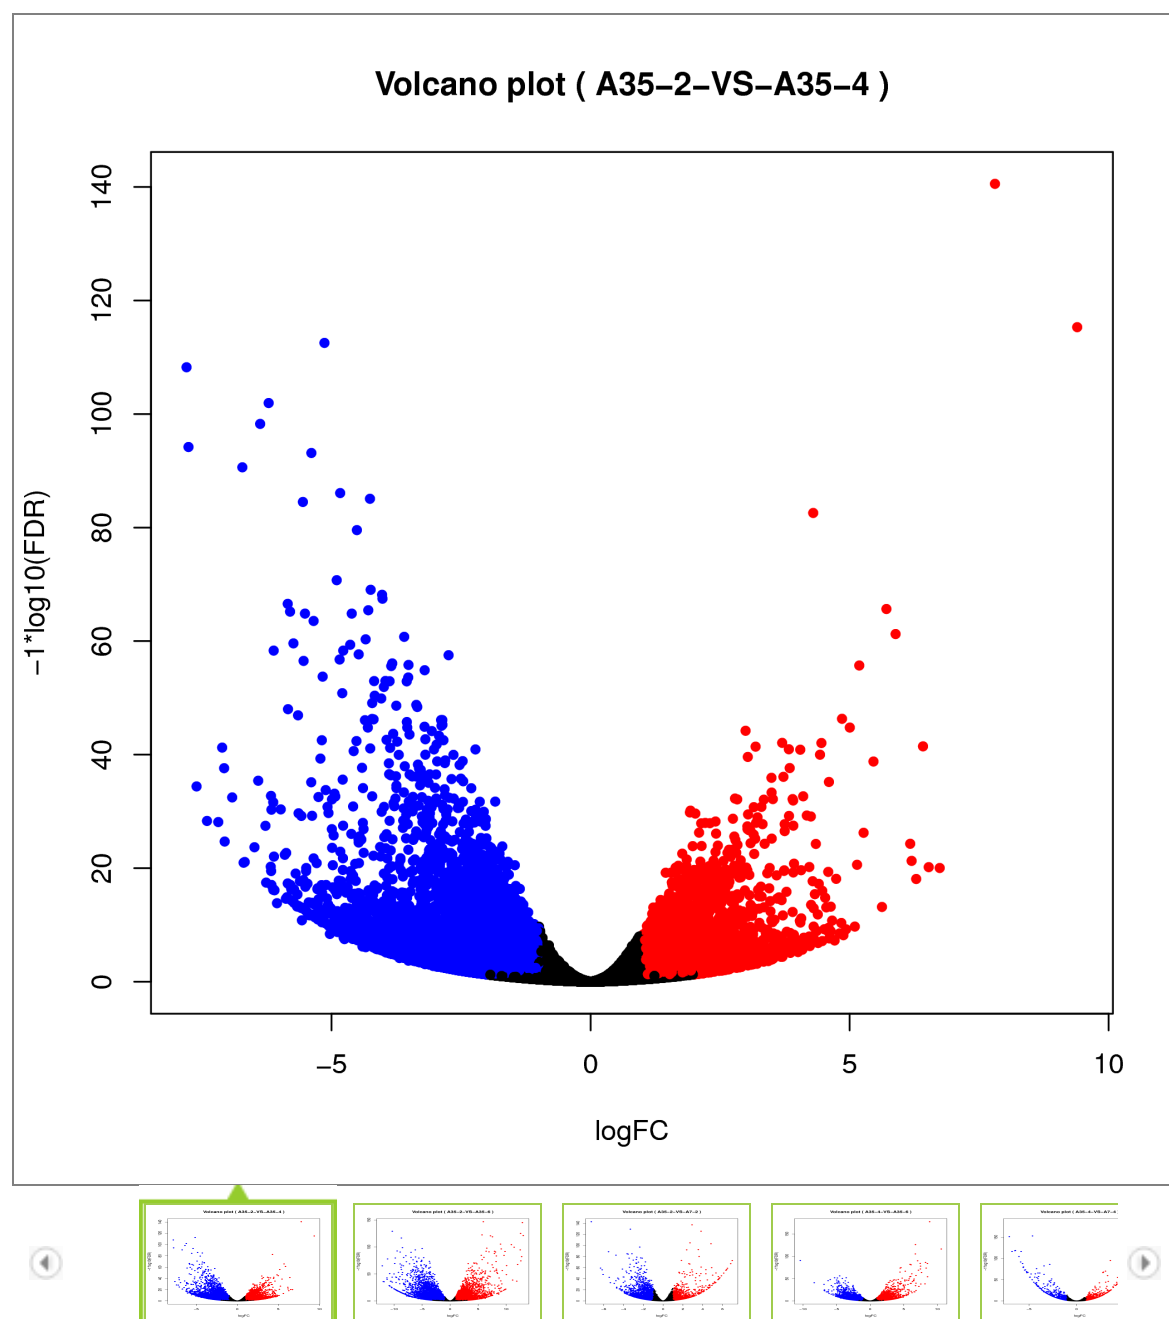

Figure 10.3.2 差异基因火山图，显著差异基因红色点表示上调，蓝色点表示下调；横坐标代表基因在不同样本中表达倍数变化；纵坐标代表基因表达量变化差异的统计学显著性

## 10.4 差异表达基因聚类分析

聚类分析是对数据进行相似度计算，并根据相似度将数据进行分类，从而将具有相同功能或密切联系的基因聚集成类，识别未知基因的功能或已知基因的未知功能，推断是否共同参与同一代谢过程或细胞通路。以不同实验条件下的差异基因的RPKM 值为表达水平，做层次聚类 (hierarchical clustering)分析，这个方法最大的特征就是易于生成树状图。不同的颜色的区域代表不同的聚类分组信息，同组内的基因表达模式相近，可能具有相似的功能或参与相同的生物学过程。

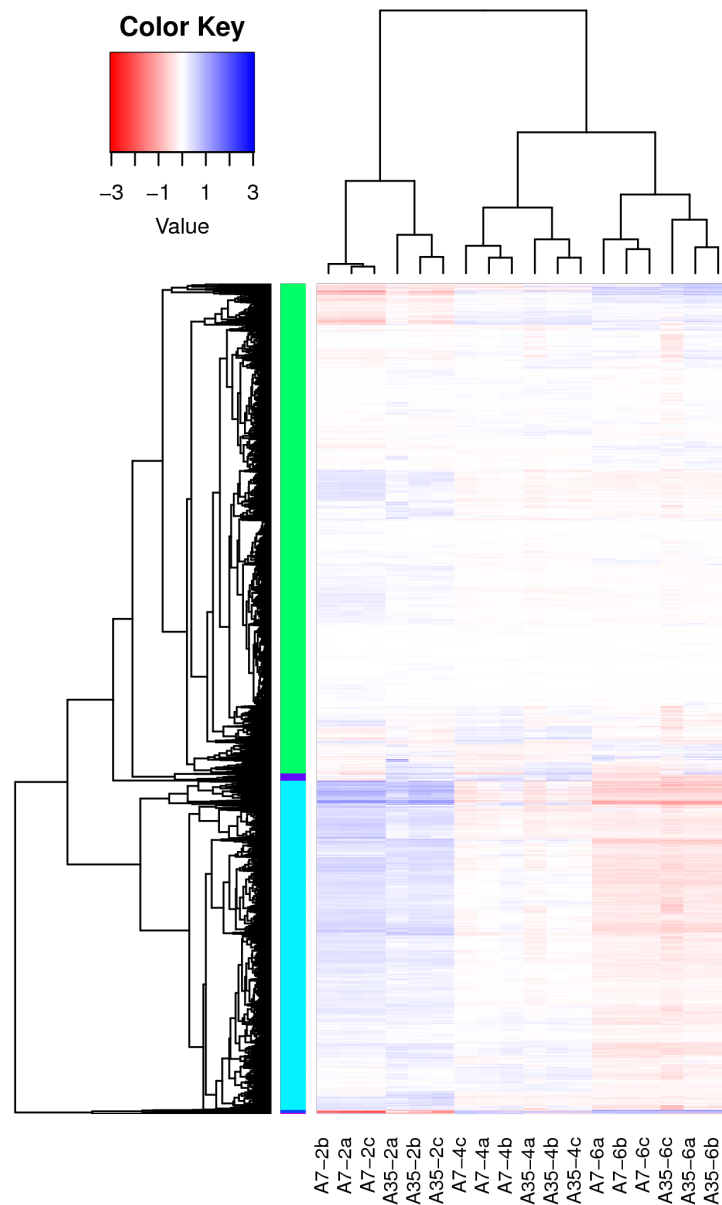

Figure 10.4.1 差异基因聚类图

以 $\log_{10}(\text{RPKM}+1)$  值进行聚类，蓝色表示高表达基因，红色表示低表达基因。颜色从红到蓝，表示基因表达量越高。

## 10.5 差异基因维恩图

具体分析过程中，如果gene id一致时，则判定为差异基因为一致的。维恩图展示了样品两两间特有差异基因的数量，以及共有差异基因的数量(组数2-5，超出该范围则不作Venn图)。

## 11 差异基因GO富集分析

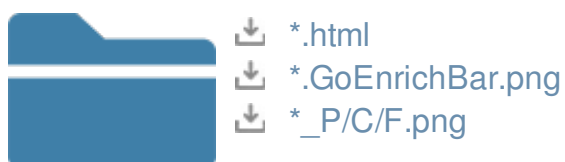

Gene Ontology (GO) 是一个国际化的基因功能分类体系，提供了一套动态更新的标准词汇表 (controlled vocabulary) 来全面描述生物体中基因和基因产物的属性。GO包含三个ontology，分别描述基因的分子功能 (molecular function)、细胞组分 (cellular component)、参与的生物过程 (biological process)。

GO功能显著性富集分析给出与基因组背景相比，在差异表达基因中显著富集的GO功能条目，从而给出差异表达基因与哪些生物学功能显著相关。该分析首先把所有差异表达基因向Gene Ontology数据库的各个term映射，计算每个term的基因数目，然后应用超几何检验，找出与整个基因组背景相比，在差异表达基因中显著富集的GO条目，其计算公式为：

$$P = 1 - \sum_{i=0}^{m-1} \frac{\binom{M}{i} \binom{N-M}{n-i}}{\binom{N}{n}}$$

Figure 11.1

其中，N为所有基因中具有GO注释的基因数目；n为N中差异表达基因的数目；M为所有基因中注释为某特定GO term的基因数目；m为注释为某特定GO term的差异表达基因数目。计算得到的p-value通过Bonferroni校正之后，以corrected p-value≤0.05为阈值，满足此条件的GO term定义为在差异表达基因中显著富集的GO term。通过GO功能显著性富集分析能确定差异表达基因行使的主要生物学功能。

### 11.1 差异基因GO富集列表

Table 11.1.1 差异基因GO富集结果示例 (详见: [batchGOView.html](#))

| Gene Ontology term | Cluster frequency         | Genome frequency of use      | Corrected P-value | FDR  | False Positive | Genes annotated to the term |
|--------------------|---------------------------|------------------------------|-------------------|------|----------------|-----------------------------|
| catalytic activity | 13 out of 23 genes, 56.5% | 914 out of 3874 genes, 23.6% | 8.22e-05          | 0.23 | 0              | gene1, gene2...             |

- (1) Gene Ontology term : GO的类别
- (2) Cluster frequency : 聚类频率, 即目标基因中注释到该类别的基因比例
- (3) Genome frequency of use : GO数据库中, 注释到该类别的基因占所有基因的比例
- (4) Corrected P-value : 校正的P-value
- (5) FDR : 错误发现率
- (6) False Positive : 假阳性
- (7) Genes annotated to the term : 注释到此类别的基因列表

### 11.2 差异基因GO富集DAG图

有向无环图(Directed Acyclic Graph, DAG)为差异基因GO富集分析结果的图形化展示方式, 分支代表包含关系, 从上至下所定义的功能范围越来越小, 一般选取GO富集分析的结果前10位作为有向无环图的主节点, 并通过包含关系, 将相关联的GO Term一起展示, 颜色的深浅代表富集程度。分别对生物过程(biological process)、分子功能(molecular function)和细胞组分(cellular component)绘制DAG图。

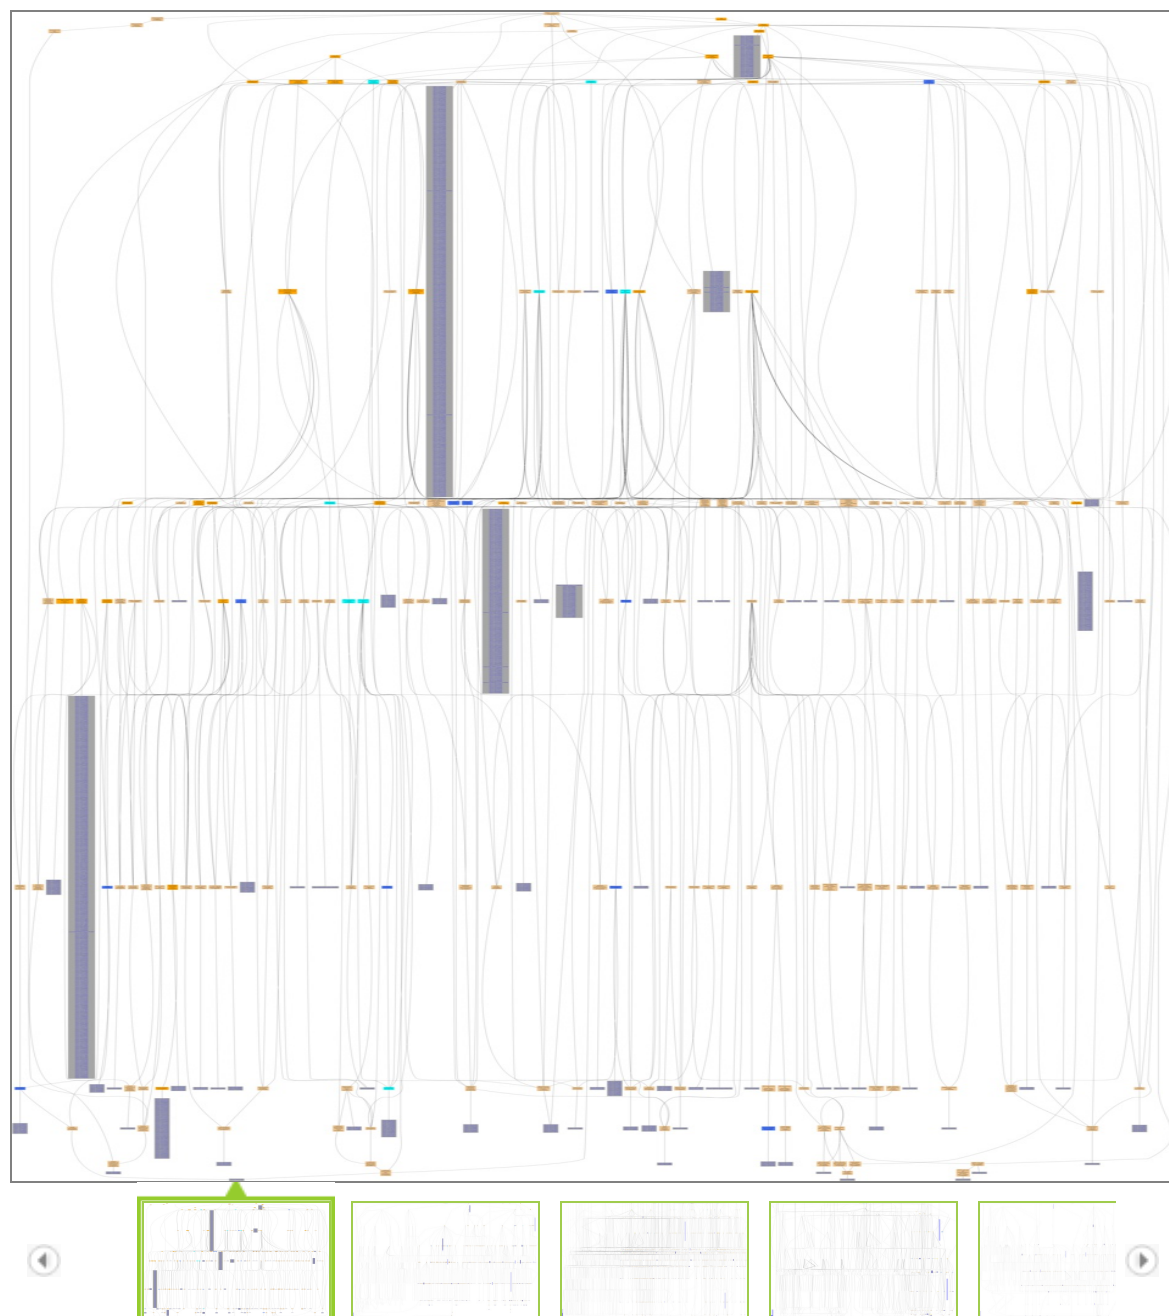

Figure 11.2.1 GO富集有向无环图

图中蓝色字体标所在GO term层级下的基因列表，GO term的颜色代表富集程度，由Corrected P-value 来标定。

| P-value           | 颜色   |
|-------------------|------|
| $\leq 1e-10$      | 深蓝色  |
| $1e-10$ to $1e-8$ | 亮蓝色  |
| $1e-8$ to $1e-6$  | 浅蓝色  |
| $1e-6$ to $1e-4$  | 淡蓝色  |
| $1e-4$ to $1e-2$  | 极淡蓝色 |
| $> 0.01$          | 白色   |

Figure 11.2.2

### 11.3 差异基因GO富集柱状图

差异基因GO富集柱状图，直观地反映出在生物过程(biological process)、细胞组分(cellular component)和分子功能(molecular function)富集的GO term上差异基因的个数分布情况。我们挑选了富集最显著的30个GO term在图中展示，如果不足30条，则全部展示。

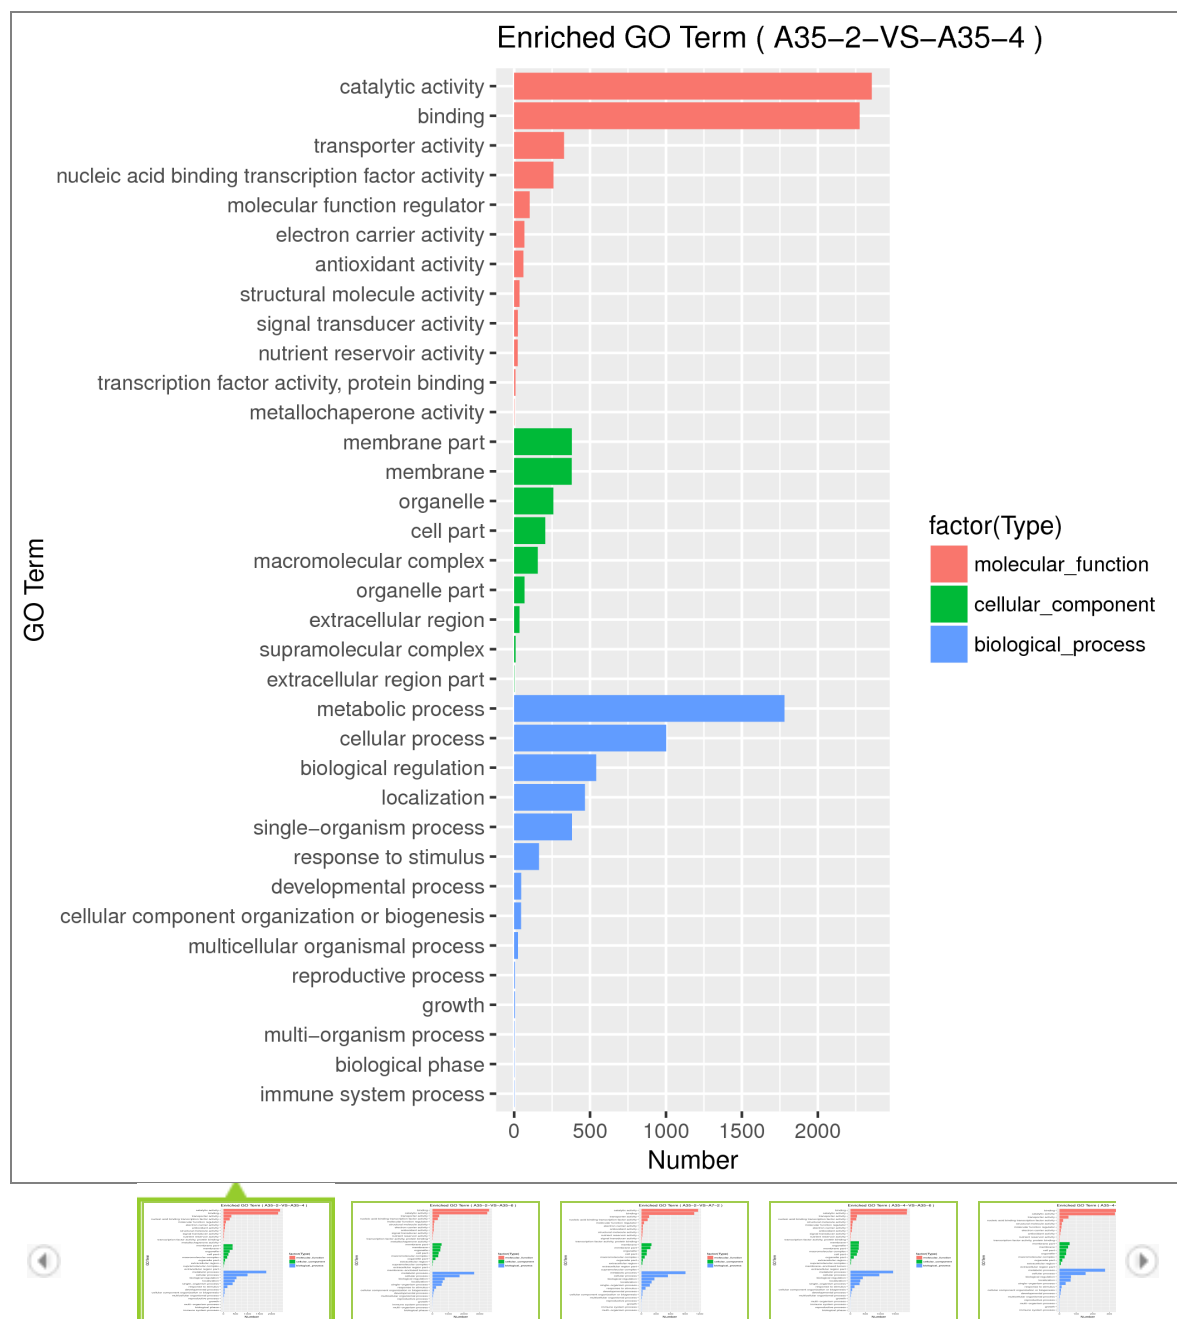

Figure 11.3.1 GO富集柱状图，纵坐标为富集的GO term，横坐标为该term中差异基因个数。不同颜色用来区分生物过程、细胞组分和分子功能。

### 12 差异基因KEGG富集分析

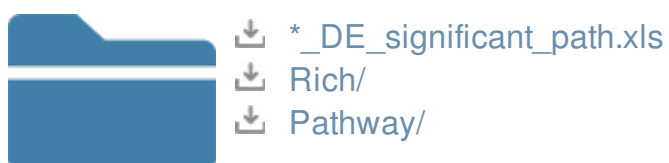

在生物体内，不同基因相互协调行使其生物学功能，通过Pathway显著性富集能确定差异表达基因参与的最主要生化代谢途径和信号转导途径。KEGG (Kyoto Encyclopedia of Genes and Genomes) 是有关Pathway的主要公共数据库(Kanehisa,2008)。Pathway显著性富集分析以

KEGG Pathway为单位，应用超几何检验，找出与整个基因组背景相比，在差异表达基因中显著性富集的Pathway。该分析的计算公式：

$$p = 1 - \sum_{i=0}^{m-1} \frac{\binom{M}{i} \binom{N-M}{n-i}}{\binom{N}{n}}$$

Figure 12.1

在这里N为所有基因中具有Pathway注释的基因数目；n为N中差异表达基因的数目；M为所有基因中注释为某特定Pathway的基因数目；m为注释为某特定Pathway的差异表达基因数目。

## 12.1 差异基因KEGG富集列表

Table 12.1.1 差异基因KEGG富集列表 示例 (详见：\*DE\_significant\_path.xls)

| PathwayID | Pathway                           | DEGs with pathway annotation | All genes with pathway annotation | Pvalue   | Qvalue   | Genelist        | KOlist     |
|-----------|-----------------------------------|------------------------------|-----------------------------------|----------|----------|-----------------|------------|
| ko00982   | Drug metabolism - cytochrome P450 | 1(7.69%)                     | 7(0.42%)                          | 1.15e-03 | 1.15e-03 | gene1, gene2... | ko1, ko2.. |

- (1) PathwayID:通路ID
- (2) Pathway:通路名称
- (3) DEGs with pathway annotation:该通路在差异分析比较组中基因数量
- (4) All genes with pathway annotation :该通路在所有基因背景中的基因数量
- (5) Pvalue:该通路富集Pvalue值
- (6) Qvalue:该通路富集Qvalue值
- (7) Genelist:该通路富集差异基因列表
- (8) KOlist:该通路富集差异基因KO列表

## 12.2 差异基因KEGG富集散点图

散点图是 KEGG 富集分析结果的图形化展示方式。在此图中，KEGG 富集程度通过Rich factor、Qvalue 和富集到此通路上的基因个数来衡量。其中Richfactor 指差异表达的基因中位于该pathway 条目的基因数目与所有有注释基因中位于该pathway 条目的基因总数的比值。Rich factor 越大，表示富集的程度越大。Qvalue 是做过多重假设检验校正之后的Pvalue，Qvalue 的取值范围为[0,1]，越接近于零，表示富集越显著。我们挑选了富集最显著的30 条pathway 条目在该图中进行展示，若富集的pathway 条目不足30 条，则全部展示。

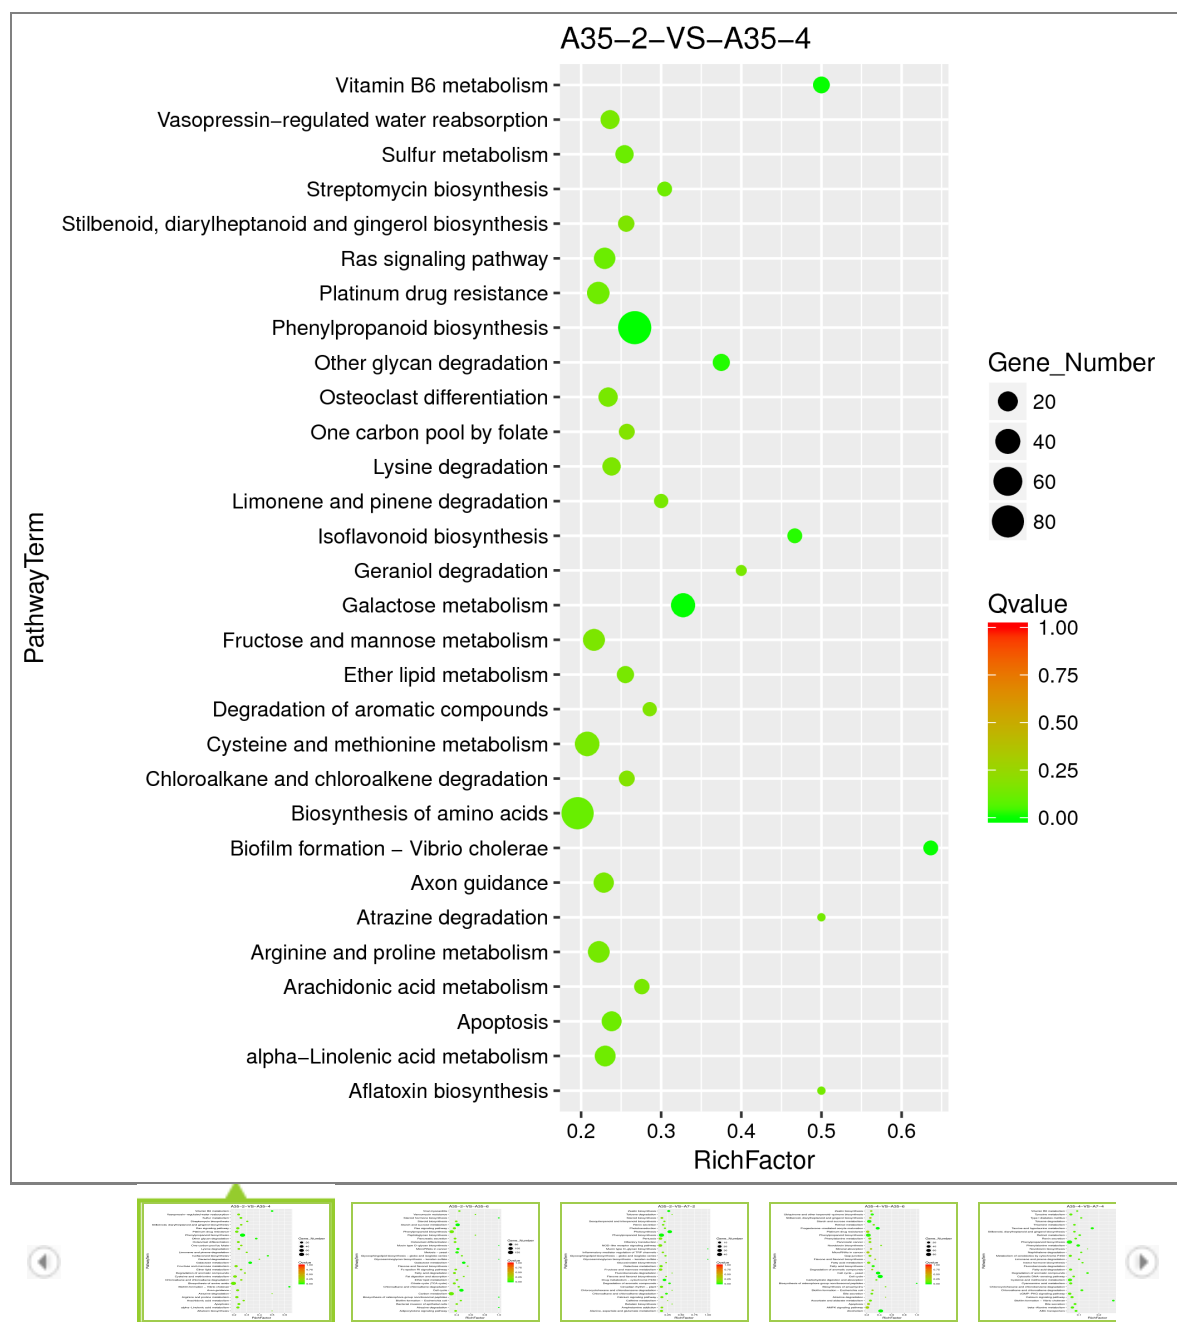

**Figure 12.2.1** 差异基因KEGG富集散点图，纵轴表示pathway名称，横轴表示Rich factor，点的大小表示此pathway中差异表达基因个数多少，而点的颜色对应于不同的Qvalue范围

### 12.3 富集KEGG通路图

将差异基因富集出的通路图展示出来，该通路图中，红色代表基因表达上调，蓝色代表基因表达下调，绿色代表基因既有上调也有下调。

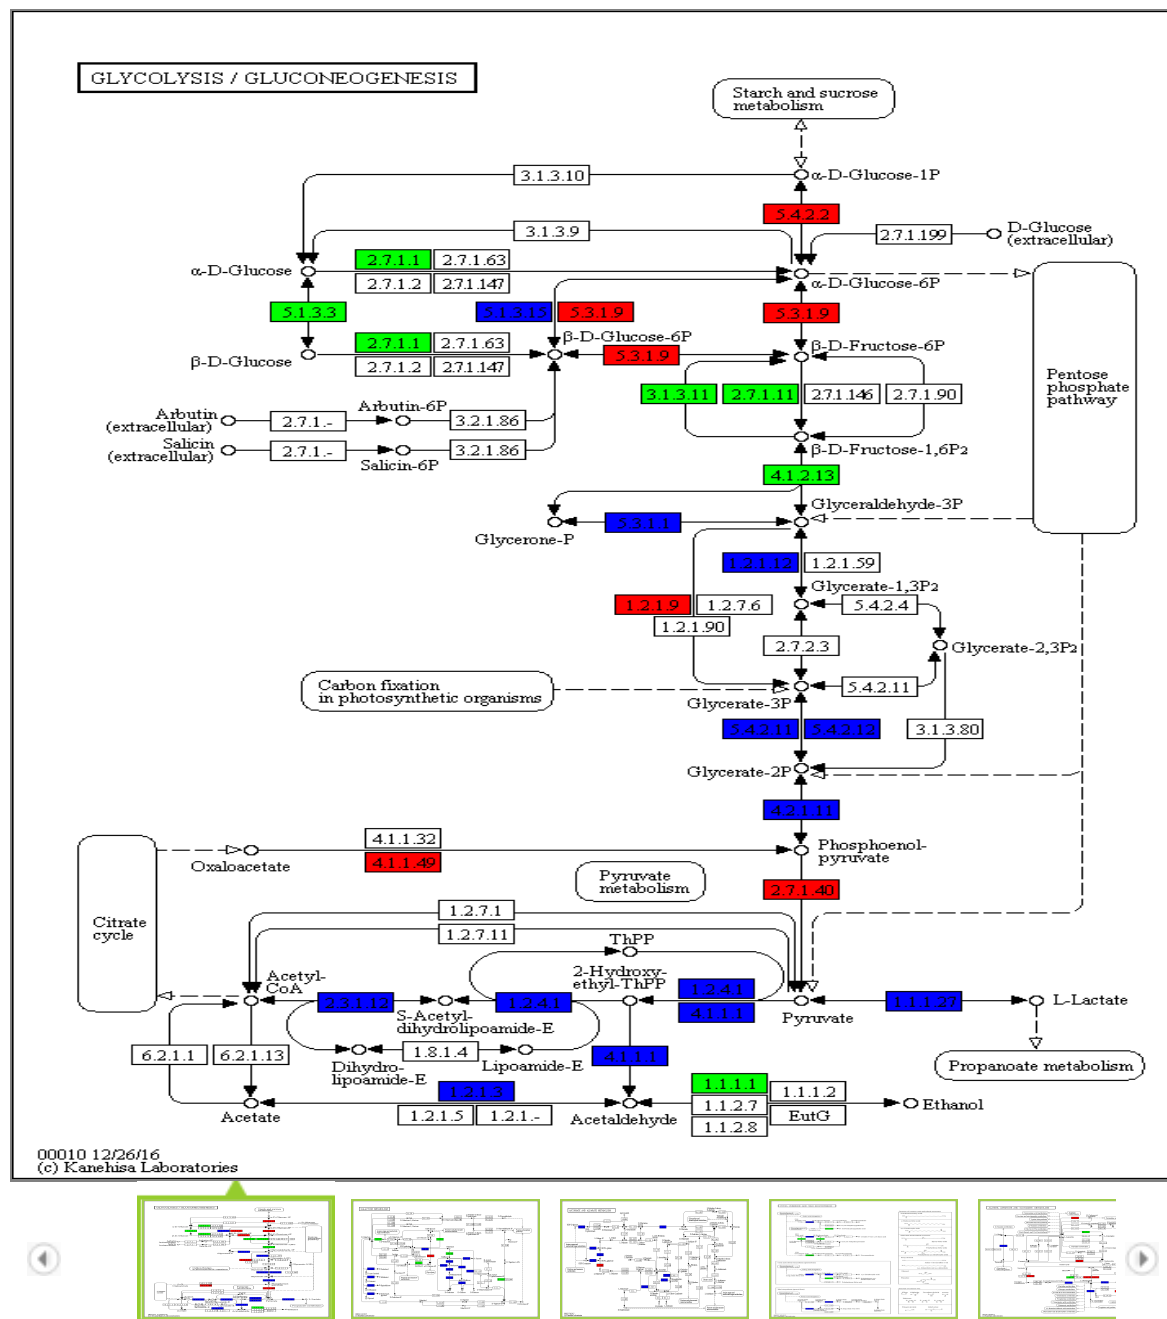

Figure 12.3.1 显著富集的KEGG pathway代谢通路图

### 13 DEU分析

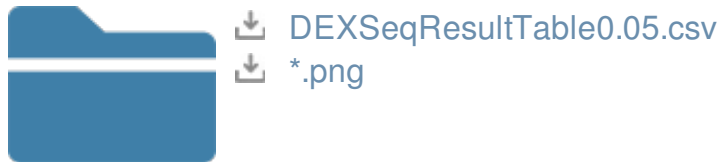

对于RNA-seq，除了gene水平的差异分析外，还可以进行DEU(differential exon usage)，即外显子水平的差异分析。DEU分析是目前最好的用于研究可变剪切中AEU(alternative exon usage)的方法。使用DEXSeq (V1.18.4) 软件进行DEU分析。DEXSeq使用广义线性模型，可以在外显子水平上检测基因的差异表达。对DEU基因筛选的标准为： $p_{adj} < 0.05$ 。DEU基因各外显子表达情况详细信通过如下图表展示，图中高亮紫色色block代表表达水平差异显著的外显子。

此分析只针对于有生物学重复的样本。如果没有生物学重复，则不进行此项分析。

Table 13.1 DEU基因列表

| groupID              | GeneID          | featureID | exonBaseMean     | dispersion         | stat             | pvalue               | padj               |
|----------------------|-----------------|-----------|------------------|--------------------|------------------|----------------------|--------------------|
| Glyma.06G267400:E007 | Glyma.06G267400 | E007      | 1.48237148354453 | 0.0331191867255544 | 25.5233882681827 | 4.37052672714306e-07 | 0.0092930509799243 |
| Glyma.13G279600:E002 | Glyma.13G279600 | E002      | 1.19766475486415 | 0.0229274008671676 | 26.4042503054059 | 2.76930436928549e-07 | 0.0092930509799243 |
| Glyma.13G279600:E001 | Glyma.13G279600 | E001      | 1.42400769867562 | 0.0516748622078059 | 24.1007700712686 | 9.1423729162232e-07  | 0.0129596183545103 |

- (1) groupID : 基因编号和外显子编号
- (2) GeneID : 基因编号
- (3) featureID : 外显子编号
- (4) exonbasemean : 矫正后的平均表达量

- (5) dispersion : 统计学值, 离差
- (6) pvalue : 统计学显著水平
- (7) padjust : 矫正后的统计学显著水平
- (8) ctrl : ctrl组的表达值
- (9) expr : expr组的表达值
- (10) log2fold\_ctrl\_expr : 矫正的差异表达倍数
- (11) genomicData.seqnames : 染色体编号
- (12) genomicData.start : 基因的起始位点
- (13) genomicData.end : 基因的终止位点
- (14) countData.Sample: 各样本的counts数
- (15) transcripts: 基因上面的转录本编号

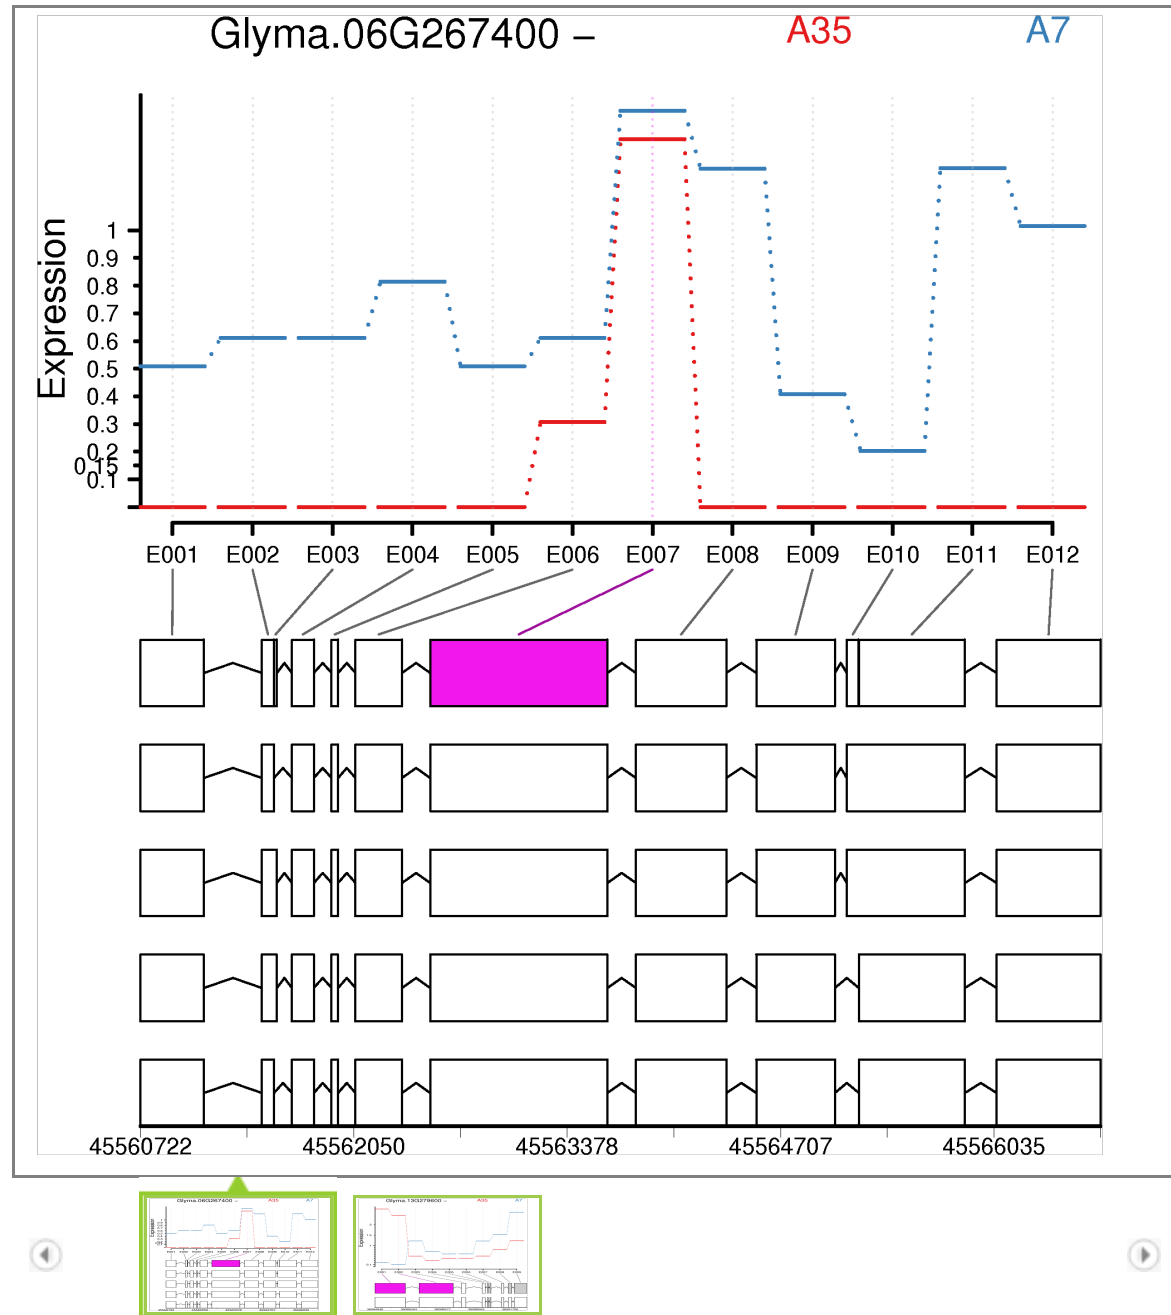

**Figure 13.1** DEU基因外显子表达水平图，纵轴表示两组样本各自在外显子上的表达值，横轴表示外显子编号，差异外显子被紫红色高亮在这个外显子所在的转录本上面。其他的转录本是该转录本的可变剪切。

#### 四、参考文献

- [1] Anders, S.(2010). HTSeq: Analysing high-throughput sequencing data with Python.(HTSeq)
- [2] Anders, S., and Huber, W. (2010). Differential expression analysis for sequence count data. Genome Biol.(DESeq)
- [3] Anders, S. and Huber, W. (2012). Differential expression of RNA-Seq data at the gene level-the DESeq package.(DESeq)
- [4] Kim, D., G. Pertea, et al. (2012). TopHat2: Parallel mapping of transcriptomes to detect InDels, gene fusions, and more.(TopHat2)
- [5] Langmead, B., Trapnell, C., Pop, M. & Salzberg, S.L. (2009). Ultrafast and memory-efficient alignment of short DNA sequences to the human genome. Genome Biol.(Bowtie)
- [6] Langmead, B. and S. L. Salzberg (2012). Fast gapped-read alignment with Bowtie 2. Nature methods.(Bowtie 2)
- [7] Marioni, J. C., C. E. Mason, et al. (2008). RNA-seq: an assessment of technical reproducibility and comparison with gene expression arrays. Genome research.
- [8] Mortazavi, A., B. A. Williams, et al. (2008). Mapping and quantifying mammalian transcriptomes by RNA-Seq. Nature methods.
- [9] Robinson, M. D., McCarthy, D. J. & Smyth, G. K. edgeR: a Bioconductor package for differential expression analysis of digital gene expression data. Bioinformatics.(edgeR)
- [10] Trapnell, C. et al. (2010). Transcript assembly and quantification by RNA-seq reveals unannotated transcripts and isoform switching during cell differentiation. Nat. Biotechnol.(Cufflinks)
- [11] Trapnell, C., Pachter, L., and Salzberg, S.L. (2009). TopHat: discovering splice junctions with RNA-Seq. Bioinformatics.(TopHat)
- [12] Trapnell, C., A. Roberts, et al. (2012). Differential gene and transcript expression analysis of RNA-seq experiments with TopHat and



Cufflinks. nature protocols. (Tophat & Cufflinks)

[13] Wang, Z., M. Gerstein, et al. (2009). RNA-Seq: a revolutionary tool for transcriptomics. Nature Reviews Genetics.

[14] Love, M. I., Anders, S., and Huber, W. (2015). Differential analysis of count data-the DESeq2 package. (DESeq2)

[15] Kim, D., Langmead, B., and Salzberg, S. L., (2015). HISAT: a fast spliced aligner with low memory requirements. (HISAT)

[16] Pertea, M., Pertea, Geo. M., Antonescu, C. M., Chang, T. C., Mendell, J. T., and Salzberg, S. L., (2015). StringTie enables improved reconstruction of a transcriptome from RNA-seq reads. (StringTie)

## 五、附录

### 1 文件目录列表

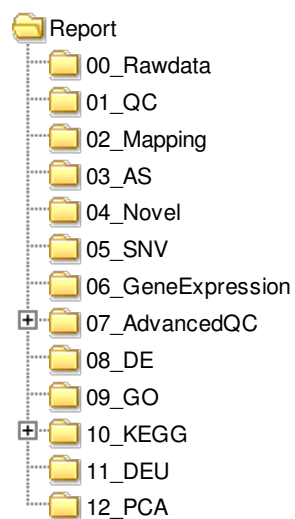

### 2 备注

结果文件建议使用Excel或者EditPlus等专业文本编辑器打开。

使用浏览器打开结题报告时，若出现类似"为了有利于保护安全性，Internet Explorer 已限制此网页运行可以访问计算机的脚本或ActiveX控件。请单击这里获取选项..."的提示，请选择允许。
